# Supplementary material for: Social Isolation and Social Support Influence Health Service Utilisation and Survival after a Cardiovascular Disease Event: A Systematic Review
Source: MDPI journal article supplement (doi:10.3390/ijerph20064853), 2023-03-09
Supplement: s1 [file s1]

## Supplementary S1: Search strategies

### S1a. Embase from the earliest record to 21st June 2020

|                          |    |                              |        |          |                                 |                        |                                                                                       |
|--------------------------|----|------------------------------|--------|----------|---------------------------------|------------------------|---------------------------------------------------------------------------------------|
| <input type="checkbox"/> | 1  | social isolation/            | 24245  | Advanced | <a href="#">Display Results</a> | <a href="#">More ▾</a> |    |
| <input type="checkbox"/> | 2  | social segregation/          | 184    | Advanced | <a href="#">Display Results</a> | <a href="#">More ▾</a> |    |
| <input type="checkbox"/> | 3  | social distance/             | 2940   | Advanced | <a href="#">Display Results</a> | <a href="#">More ▾</a> |    |
| <input type="checkbox"/> | 4  | loneliness/                  | 8325   | Advanced | <a href="#">Display Results</a> | <a href="#">More ▾</a> |    |
| <input type="checkbox"/> | 5  | psychosocial deprivation.mp. | 147    | Advanced | <a href="#">Display Results</a> | <a href="#">More ▾</a> |    |
| <input type="checkbox"/> | 6  | social participation/        | 6133   | Advanced | <a href="#">Display Results</a> | <a href="#">More ▾</a> |    |
| <input type="checkbox"/> | 7  | community participation/     | 2284   | Advanced | <a href="#">Display Results</a> | <a href="#">More ▾</a> |    |
| <input type="checkbox"/> | 8  | community integration/       | 1032   | Advanced | <a href="#">Display Results</a> | <a href="#">More ▾</a> |    |
| <input type="checkbox"/> | 9  | social* isolat*.mp.          | 27891  | Advanced | <a href="#">Display Results</a> | <a href="#">More ▾</a> |    |
| <input type="checkbox"/> | 10 | social* interact*.mp.        | 67044  | Advanced | <a href="#">Display Results</a> | <a href="#">More ▾</a> |    |
| <input type="checkbox"/> | 11 | social* support*.mp.         | 102137 | Advanced | <a href="#">Display Results</a> | <a href="#">More ▾</a> |    |
| <input type="checkbox"/> | 12 | social* disconnect*.mp.      | 166    | Advanced | <a href="#">Display Results</a> | <a href="#">More ▾</a> |    |
| <input type="checkbox"/> | 13 | social* separat*.mp.         | 258    | Advanced | <a href="#">Display Results</a> | <a href="#">More ▾</a> |  |
| <input type="checkbox"/> | 14 | social* segregat*.mp.        | 250    | Advanced | <a href="#">Display Results</a> | <a href="#">More ▾</a> |  |
| <input type="checkbox"/> | 15 | social* exclu*.mp.           | 3245   | Advanced | <a href="#">Display Results</a> | <a href="#">More ▾</a> |  |
| <input type="checkbox"/> | 16 | social* marginalis*.mp.      | 114    | Advanced | <a href="#">Display Results</a> | <a href="#">More ▾</a> |  |
| <input type="checkbox"/> | 17 | social* alienat*.mp.         | 250    | Advanced | <a href="#">Display Results</a> | <a href="#">More ▾</a> |  |
| <input type="checkbox"/> | 18 | social* communicat*.mp.      | 4562   | Advanced | <a href="#">Display Results</a> | <a href="#">More ▾</a> |  |

|                          |    |                             |        |          |                                                          |                                                                                     |
|--------------------------|----|-----------------------------|--------|----------|----------------------------------------------------------|-------------------------------------------------------------------------------------|
| <input type="checkbox"/> | 19 | social* divid*.mp.          | 28     | Advanced | <a href="#">Display Results</a>   <a href="#">More ▼</a> |   |
| <input type="checkbox"/> | 20 | social* seclu*.mp.          | 13     | Advanced | <a href="#">Display Results</a>   <a href="#">More ▼</a> |  |
| <input type="checkbox"/> | 21 | social* detach*.mp.         | 46     | Advanced | <a href="#">Display Results</a>   <a href="#">More ▼</a> |  |
| <input type="checkbox"/> | 22 | support system.mp.          | 32422  | Advanced | <a href="#">Display Results</a>   <a href="#">More ▼</a> |  |
| <input type="checkbox"/> | 23 | support network.mp.         | 1924   | Advanced | <a href="#">Display Results</a>   <a href="#">More ▼</a> |  |
| <input type="checkbox"/> | 24 | solitude.mp.                | 624    | Advanced | <a href="#">Display Results</a>   <a href="#">More ▼</a> |  |
| <input type="checkbox"/> | 25 | social* cohesi*.mp.         | 1535   | Advanced | <a href="#">Display Results</a>   <a href="#">More ▼</a> |  |
| <input type="checkbox"/> | 26 | social* tie*.mp.            | 1020   | Advanced | <a href="#">Display Results</a>   <a href="#">More ▼</a> |  |
| <input type="checkbox"/> | 27 | social* embedd*.mp.         | 213    | Advanced | <a href="#">Display Results</a>   <a href="#">More ▼</a> |  |
| <input type="checkbox"/> | 28 | social* integrat*.mp.       | 3784   | Advanced | <a href="#">Display Results</a>   <a href="#">More ▼</a> |  |
| <input type="checkbox"/> | 29 | exp Australia/              | 171731 | Advanced | <a href="#">Display Results</a>   <a href="#">More ▼</a> |  |
| <input type="checkbox"/> | 30 | exp New Zealand/            | 60011  | Advanced | <a href="#">Display Results</a>   <a href="#">More ▼</a> |  |
| <input type="checkbox"/> | 31 | Australia*.mp.              | 272765 | Advanced | <a href="#">Display Results</a>   <a href="#">More ▼</a> |  |
| <input type="checkbox"/> | 32 | New Zealand*.mp.            | 114136 | Advanced | <a href="#">Display Results</a>   <a href="#">More ▼</a> |  |
| <input type="checkbox"/> | 33 | Maori*.mp.                  | 4602   | Advanced | <a href="#">Display Results</a>   <a href="#">More ▼</a> |  |
| <input type="checkbox"/> | 34 | Aboriginal*.mp.             | 11502  | Advanced | <a href="#">Display Results</a>   <a href="#">More ▼</a> |  |
| <input type="checkbox"/> | 35 | Torres Strait Islander*.mp. | 2181   | Advanced | <a href="#">Display Results</a>   <a href="#">More ▼</a> |  |
| <input type="checkbox"/> | 36 | Indigenous*.mp.             | 43496  | Advanced | <a href="#">Display Results</a>   <a href="#">More ▼</a> |  |

|                          |    |                                 |         |          |                                 |                        |                                                                                     |
|--------------------------|----|---------------------------------|---------|----------|---------------------------------|------------------------|-------------------------------------------------------------------------------------|
| <input type="checkbox"/> | 37 | ATSI.mp.                        | 124     | Advanced | <a href="#">Display Results</a> | <a href="#">More ▼</a> |   |
| <input type="checkbox"/> | 38 | social support/                 | 90575   | Advanced | <a href="#">Display Results</a> | <a href="#">More ▼</a> |  |
| <input type="checkbox"/> | 39 | aotearoa*.mp.                   | 498     | Advanced | <a href="#">Display Results</a> | <a href="#">More ▼</a> |  |
| <input type="checkbox"/> | 40 | cardiovascular disease/         | 277325  | Advanced | <a href="#">Display Results</a> | <a href="#">More ▼</a> |  |
| <input type="checkbox"/> | 41 | cardiovascular disease*.tw.     | 245963  | Advanced | <a href="#">Display Results</a> | <a href="#">More ▼</a> |  |
| <input type="checkbox"/> | 42 | cardiovascular.mp.              | 1053499 | Advanced | <a href="#">Display Results</a> | <a href="#">More ▼</a> |  |
| <input type="checkbox"/> | 43 | CVD.mp.                         | 56675   | Advanced | <a href="#">Display Results</a> | <a href="#">More ▼</a> |  |
| <input type="checkbox"/> | 44 | heart disease/                  | 127875  | Advanced | <a href="#">Display Results</a> | <a href="#">More ▼</a> |  |
| <input type="checkbox"/> | 45 | coronary disease.mp.            | 28643   | Advanced | <a href="#">Display Results</a> | <a href="#">More ▼</a> |  |
| <input type="checkbox"/> | 46 | coronary heart disease*.mp.     | 72891   | Advanced | <a href="#">Display Results</a> | <a href="#">More ▼</a> |  |
| <input type="checkbox"/> | 47 | myocardial infarction*.mp.      | 302976  | Advanced | <a href="#">Display Results</a> | <a href="#">More ▼</a> |  |
| <input type="checkbox"/> | 48 | heart attack*.mp.               | 8271    | Advanced | <a href="#">Display Results</a> | <a href="#">More ▼</a> |  |
| <input type="checkbox"/> | 49 | stroke.mp.                      | 449558  | Advanced | <a href="#">Display Results</a> | <a href="#">More ▼</a> |  |
| <input type="checkbox"/> | 50 | heart failure/                  | 249444  | Advanced | <a href="#">Display Results</a> | <a href="#">More ▼</a> |  |
| <input type="checkbox"/> | 51 | coronary artery disease/        | 206945  | Advanced | <a href="#">Display Results</a> | <a href="#">More ▼</a> |  |
| <input type="checkbox"/> | 52 | myocardial ischemia.mp.         | 41760   | Advanced | <a href="#">Display Results</a> | <a href="#">More ▼</a> |  |
| <input type="checkbox"/> | 53 | myocardial ischaemia.mp.        | 7433    | Advanced | <a href="#">Display Results</a> | <a href="#">More ▼</a> |  |
| <input type="checkbox"/> | 54 | hypertensive heart disease*.mp. | 2825    | Advanced | <a href="#">Display Results</a> | <a href="#">More ▼</a> |  |

|                          |    |                                                                                                                                                                         |         |          |                                 |                        |                                                                                     |
|--------------------------|----|-------------------------------------------------------------------------------------------------------------------------------------------------------------------------|---------|----------|---------------------------------|------------------------|-------------------------------------------------------------------------------------|
| <input type="checkbox"/> | 55 | angina.mp.                                                                                                                                                              | 120049  | Advanced | <a href="#">Display Results</a> | <a href="#">More ▼</a> |   |
| <input type="checkbox"/> | 56 | angina pectoris/                                                                                                                                                        | 68267   | Advanced | <a href="#">Display Results</a> | <a href="#">More ▼</a> |  |
| <input type="checkbox"/> | 57 | vascular disease/                                                                                                                                                       | 69541   | Advanced | <a href="#">Display Results</a> | <a href="#">More ▼</a> |  |
| <input type="checkbox"/> | 58 | ((Cardiovascular or cardio-vascular) adj3 (disease* or disorder* or condition*)),tw.                                                                                    | 276084  | Advanced | <a href="#">Display Results</a> | <a href="#">More ▼</a> |  |
| <input type="checkbox"/> | 59 | ((Coronary or heart or cardiac or myocardi*) adj3 (disease* or disorder* or condition* or infarct*)),tw.                                                                | 700503  | Advanced | <a href="#">Display Results</a> | <a href="#">More ▼</a> |  |
| <input type="checkbox"/> | 60 | brain ischemia/                                                                                                                                                         | 142426  | Advanced | <a href="#">Display Results</a> | <a href="#">More ▼</a> |  |
| <input type="checkbox"/> | 61 | brain ischaemia.mp.                                                                                                                                                     | 723     | Advanced | <a href="#">Display Results</a> | <a href="#">More ▼</a> |  |
| <input type="checkbox"/> | 62 | cerebrovascular accident/                                                                                                                                               | 208472  | Advanced | <a href="#">Display Results</a> | <a href="#">More ▼</a> |  |
| <input type="checkbox"/> | 63 | social* distan*.mp.                                                                                                                                                     | 4183    | Advanced | <a href="#">Display Results</a> | <a href="#">More ▼</a> |  |
| <input type="checkbox"/> | 64 | 1 or 2 or 3 or 4 or 5 or 6 or 7 or 8 or 9 or 10 or 11 or 12 or 13 or 14 or 15 or 16 or 17 or 18 or 19 or 20 or 21 or 22 or 23 or 24 or 25 or 26 or 27 or 28 or 38 or 63 | 248241  | Advanced | <a href="#">Display Results</a> | <a href="#">More ▼</a> |  |
| <input type="checkbox"/> | 65 | 29 or 30 or 31 or 32 or 33 or 34 or 35 or 36 or 37 or 39                                                                                                                | 390014  | Advanced | <a href="#">Display Results</a> | <a href="#">More ▼</a> |  |
| <input type="checkbox"/> | 66 | 40 or 41 or 42 or 43 or 44 or 45 or 46 or 47 or 48 or 49 or 50 or 51 or 52 or 53 or 54 or 55 or 56 or 57 or 58 or 59 or 60 or 61 or 62                                  | 2330475 | Advanced | <a href="#">Display Results</a> | <a href="#">More ▼</a> |  |
| <input type="checkbox"/> | 67 | 64 and 65 and 66                                                                                                                                                        | 395     | Advanced | <a href="#">Display Results</a> | <a href="#">More ▼</a> |  |

## S1b. MEDLINE from the earliest record to 21st June 2020

|                          |    |                                                   |       |          |                                 |                        |                                                                                       |
|--------------------------|----|---------------------------------------------------|-------|----------|---------------------------------|------------------------|---------------------------------------------------------------------------------------|
| <input type="checkbox"/> | 1  | Social Isolation/                                 | 13200 | Advanced | <a href="#">Display Results</a> | <a href="#">More ▼</a> |    |
| <input type="checkbox"/> | 2  | Social Segregation/                               | 131   | Advanced | <a href="#">Display Results</a> | <a href="#">More ▼</a> |    |
| <input type="checkbox"/> | 3  | Social Distance/                                  | 2878  | Advanced | <a href="#">Display Results</a> | <a href="#">More ▼</a> |    |
| <input type="checkbox"/> | 4  | Social Alienation/                                | 1388  | Advanced | <a href="#">Display Results</a> | <a href="#">More ▼</a> |    |
| <input type="checkbox"/> | 5  | Loneliness/                                       | 3661  | Advanced | <a href="#">Display Results</a> | <a href="#">More ▼</a> |    |
| <input type="checkbox"/> | 6  | Psychosocial Deprivation/                         | 1996  | Advanced | <a href="#">Display Results</a> | <a href="#">More ▼</a> |    |
| <input type="checkbox"/> | 7  | Social Participation/ or Community Participation/ | 19419 | Advanced | <a href="#">Display Results</a> | <a href="#">More ▼</a> |    |
| <input type="checkbox"/> | 8  | Community Integration/                            | 344   | Advanced | <a href="#">Display Results</a> | <a href="#">More ▼</a> |    |
| <input type="checkbox"/> | 9  | social* isolat*.mp.                               | 16835 | Advanced | <a href="#">Display Results</a> | <a href="#">More ▼</a> |    |
| <input type="checkbox"/> | 10 | social* interact*.mp.                             | 16446 | Advanced | <a href="#">Display Results</a> | <a href="#">More ▼</a> |    |
| <input type="checkbox"/> | 11 | social* support*.mp.                              | 82978 | Advanced | <a href="#">Display Results</a> | <a href="#">More ▼</a> |    |
| <input type="checkbox"/> | 12 | social* disconnect*.mp.                           | 93    | Advanced | <a href="#">Display Results</a> | <a href="#">More ▼</a> |    |
| <input type="checkbox"/> | 13 | social* separat*.mp.                              | 182   | Advanced | <a href="#">Display Results</a> | <a href="#">More ▼</a> |    |
| <input type="checkbox"/> | 14 | social* segregat*.mp.                             | 189   | Advanced | <a href="#">Display Results</a> | <a href="#">More ▼</a> |    |
| <input type="checkbox"/> | 15 | social* exclu*.mp.                                | 1572  | Advanced | <a href="#">Display Results</a> | <a href="#">More ▼</a> |    |
| <input type="checkbox"/> | 16 | social* marginalis*.mp.                           | 64    | Advanced | <a href="#">Display Results</a> | <a href="#">More ▼</a> |   |
| <input type="checkbox"/> | 17 | social* alienat*.mp.                              | 1472  | Advanced | <a href="#">Display Results</a> | <a href="#">More ▼</a> |  |
| <input type="checkbox"/> | 18 | social* communicat*.mp.                           | 2601  | Advanced | <a href="#">Display Results</a> | <a href="#">More ▼</a> |  |

|                          |    |                             |        |          |                                                          |                                                                                     |
|--------------------------|----|-----------------------------|--------|----------|----------------------------------------------------------|-------------------------------------------------------------------------------------|
| <input type="checkbox"/> | 19 | social* divid*.mp.          | 22     | Advanced | <a href="#">Display Results</a>   <a href="#">More ▼</a> |   |
| <input type="checkbox"/> | 20 | social* seclu*.mp.          | 6      | Advanced | <a href="#">Display Results</a>   <a href="#">More ▼</a> |  |
| <input type="checkbox"/> | 21 | social* detach*.mp.         | 32     | Advanced | <a href="#">Display Results</a>   <a href="#">More ▼</a> |  |
| <input type="checkbox"/> | 22 | support system.mp.          | 6617   | Advanced | <a href="#">Display Results</a>   <a href="#">More ▼</a> |  |
| <input type="checkbox"/> | 23 | support network.mp.         | 1143   | Advanced | <a href="#">Display Results</a>   <a href="#">More ▼</a> |  |
| <input type="checkbox"/> | 24 | solitude.mp.                | 344    | Advanced | <a href="#">Display Results</a>   <a href="#">More ▼</a> |  |
| <input type="checkbox"/> | 25 | social* cohesi*.mp.         | 1097   | Advanced | <a href="#">Display Results</a>   <a href="#">More ▼</a> |  |
| <input type="checkbox"/> | 26 | social* tie*.mp.            | 736    | Advanced | <a href="#">Display Results</a>   <a href="#">More ▼</a> |  |
| <input type="checkbox"/> | 27 | social* embedd*.mp.         | 157    | Advanced | <a href="#">Display Results</a>   <a href="#">More ▼</a> |  |
| <input type="checkbox"/> | 28 | social* integrat*.mp.       | 2354   | Advanced | <a href="#">Display Results</a>   <a href="#">More ▼</a> |  |
| <input type="checkbox"/> | 29 | exp Australia/              | 143439 | Advanced | <a href="#">Display Results</a>   <a href="#">More ▼</a> |  |
| <input type="checkbox"/> | 30 | exp New Zealand/            | 39132  | Advanced | <a href="#">Display Results</a>   <a href="#">More ▼</a> |  |
| <input type="checkbox"/> | 31 | Australia*.mp.              | 163573 | Advanced | <a href="#">Display Results</a>   <a href="#">More ▼</a> |  |
| <input type="checkbox"/> | 32 | New Zealand*.mp.            | 65043  | Advanced | <a href="#">Display Results</a>   <a href="#">More ▼</a> |  |
| <input type="checkbox"/> | 33 | Maori*.mp.                  | 3103   | Advanced | <a href="#">Display Results</a>   <a href="#">More ▼</a> |  |
| <input type="checkbox"/> | 34 | Aboriginal*.mp.             | 7886   | Advanced | <a href="#">Display Results</a>   <a href="#">More ▼</a> |  |
| <input type="checkbox"/> | 35 | Torres Strait Islander*.mp. | 1310   | Advanced | <a href="#">Display Results</a>   <a href="#">More ▼</a> |  |
| <input type="checkbox"/> | 36 | Indigenous*.mp.             | 28570  | Advanced | <a href="#">Display Results</a>   <a href="#">More ▼</a> |  |

|                          |    |                                 |        |          |                                                          |                                                                                       |
|--------------------------|----|---------------------------------|--------|----------|----------------------------------------------------------|---------------------------------------------------------------------------------------|
| <input type="checkbox"/> | 37 | ATSI.mp.                        | 54     | Advanced | <a href="#">Display Results</a>   <a href="#">More ▼</a> |    |
| <input type="checkbox"/> | 38 | Social Support/                 | 70251  | Advanced | <a href="#">Display Results</a>   <a href="#">More ▼</a> |    |
| <input type="checkbox"/> | 39 | aotearoa*.mp.                   | 322    | Advanced | <a href="#">Display Results</a>   <a href="#">More ▼</a> |    |
| <input type="checkbox"/> | 40 | Cardiovascular Diseases/        | 147352 | Advanced | <a href="#">Display Results</a>   <a href="#">More ▼</a> |    |
| <input type="checkbox"/> | 41 | cardiovascular disease*.tw.     | 143104 | Advanced | <a href="#">Display Results</a>   <a href="#">More ▼</a> |    |
| <input type="checkbox"/> | 42 | cardiovascular.mp.              | 509330 | Advanced | <a href="#">Display Results</a>   <a href="#">More ▼</a> |    |
| <input type="checkbox"/> | 43 | CVD.mp.                         | 27638  | Advanced | <a href="#">Display Results</a>   <a href="#">More ▼</a> |    |
| <input type="checkbox"/> | 44 | Heart Diseases/                 | 69218  | Advanced | <a href="#">Display Results</a>   <a href="#">More ▼</a> |    |
| <input type="checkbox"/> | 45 | Coronary Disease/               | 130707 | Advanced | <a href="#">Display Results</a>   <a href="#">More ▼</a> |    |
| <input type="checkbox"/> | 46 | coronary heart disease*.mp.     | 46536  | Advanced | <a href="#">Display Results</a>   <a href="#">More ▼</a> |    |
| <input type="checkbox"/> | 47 | Myocardial Infarction/          | 165144 | Advanced | <a href="#">Display Results</a>   <a href="#">More ▼</a> |    |
| <input type="checkbox"/> | 48 | heart attack*.mp.               | 4859   | Advanced | <a href="#">Display Results</a>   <a href="#">More ▼</a> |    |
| <input type="checkbox"/> | 49 | Stroke/                         | 100731 | Advanced | <a href="#">Display Results</a>   <a href="#">More ▼</a> |    |
| <input type="checkbox"/> | 50 | Heart Failure/                  | 117748 | Advanced | <a href="#">Display Results</a>   <a href="#">More ▼</a> |    |
| <input type="checkbox"/> | 51 | Coronary Artery Disease/        | 61642  | Advanced | <a href="#">Display Results</a>   <a href="#">More ▼</a> |    |
| <input type="checkbox"/> | 52 | Myocardial Ischemia/            | 38554  | Advanced | <a href="#">Display Results</a>   <a href="#">More ▼</a> |    |
| <input type="checkbox"/> | 53 | myocardial ischaemia.mp.        | 4848   | Advanced | <a href="#">Display Results</a>   <a href="#">More ▼</a> |  |
| <input type="checkbox"/> | 54 | hypertensive heart disease*.mp. | 1480   | Advanced | <a href="#">Display Results</a>   <a href="#">More ▼</a> |  |



|                          |    |                                                                                                                                                                         |         |          |                                                          |                                                                                     |
|--------------------------|----|-------------------------------------------------------------------------------------------------------------------------------------------------------------------------|---------|----------|----------------------------------------------------------|-------------------------------------------------------------------------------------|
| <input type="checkbox"/> | 55 | Angina Pectoris/                                                                                                                                                        | 32432   | Advanced | <a href="#">Display Results</a>   <a href="#">More ▼</a> |  |
| <input type="checkbox"/> | 56 | angina.mp.                                                                                                                                                              | 66079   | Advanced | <a href="#">Display Results</a>   <a href="#">More ▼</a> |  |
| <input type="checkbox"/> | 57 | Vascular Diseases/                                                                                                                                                      | 36395   | Advanced | <a href="#">Display Results</a>   <a href="#">More ▼</a> |  |
| <input type="checkbox"/> | 58 | ((cardiovascular or cardio-vascular) adj3 (disease* or disorder* or condition*)).tw.                                                                                    | 159951  | Advanced | <a href="#">Display Results</a>   <a href="#">More ▼</a> |  |
| <input type="checkbox"/> | 59 | ((Coronary or heart or cardiac or myocardi*) adj3 (disease* or disorder* or condition* or infarct*)).tw.                                                                | 416503  | Advanced | <a href="#">Display Results</a>   <a href="#">More ▼</a> |  |
| <input type="checkbox"/> | 60 | Brain Ischemia/                                                                                                                                                         | 51871   | Advanced | <a href="#">Display Results</a>   <a href="#">More ▼</a> |  |
| <input type="checkbox"/> | 61 | brain ischaemia.mp.                                                                                                                                                     | 460     | Advanced | <a href="#">Display Results</a>   <a href="#">More ▼</a> |  |
| <input type="checkbox"/> | 62 | cerebrovascular accident*.tw.                                                                                                                                           | 6018    | Advanced | <a href="#">Display Results</a>   <a href="#">More ▼</a> |  |
| <input type="checkbox"/> | 63 | social* distan*.mp.                                                                                                                                                     | 3702    | Advanced | <a href="#">Display Results</a>   <a href="#">More ▼</a> |  |
| <input type="checkbox"/> | 64 | 1 or 2 or 3 or 4 or 5 or 6 or 7 or 8 or 9 or 10 or 11 or 12 or 13 or 14 or 15 or 16 or 17 or 18 or 19 or 20 or 21 or 22 or 23 or 24 or 25 or 26 or 27 or 28 or 38 or 63 | 152554  | Advanced | <a href="#">Display Results</a>   <a href="#">More ▼</a> |  |
| <input type="checkbox"/> | 65 | 29 or 30 or 31 or 32 or 33 or 34 or 35 or 36 or 37 or 39                                                                                                                | 258302  | Advanced | <a href="#">Display Results</a>   <a href="#">More ▼</a> |  |
| <input type="checkbox"/> | 66 | 40 or 41 or 42 or 43 or 44 or 45 or 46 or 47 or 48 or 49 or 50 or 51 or 52 or 53 or 54 or 55 or 56 or 57 or 58 or 59 or 60 or 61 or 62                                  | 1253900 | Advanced | <a href="#">Display Results</a>   <a href="#">More ▼</a> |  |
| <input type="checkbox"/> | 67 | 64 and 65 and 66                                                                                                                                                        | 135     | Advanced | <a href="#">Display Results</a>   <a href="#">More ▼</a> |  |



## S1c. Scopus from the earliest record to 21st June 2020

# 431 document results

(( TITLE-ABS-KEY ( "social\* isolat\*" OR "social\* interact\*" OR "social\* support\*" ) OR TITLE-ABS-KEY ( "social\* disconnect\*" OR "social\* separat\*" OR "social\* segregat\*" ) OR TITLE-ABS-KEY ( "social\* exclu\*" OR "social\* distan\*" OR "social\* marginalis\*" ) OR TITLE-ABS-KEY ( "social\* alienat\*" OR "social\* communicat\*" OR "social\* divid\*" ) OR TITLE-ABS-KEY ( "social\* seclu\*" OR "social\* detach\*" OR "support system" ) OR TITLE-ABS-KEY ( "support network" OR "loneliness" OR "solitude" ) OR TITLE-ABS-KEY ( "psychosocial deprivation" OR "social participation" OR "community participation" ) OR TITLE-ABS-KEY ( "social\* cohesi\*" OR "social\* tie\*" OR "social\* embedd\*" ) OR TITLE-ABS-KEY ( "community integration" OR "social\* integrat\*" ))) AND (( TITLE-ABS-KEY ( australia\* OR "new zealand\*" ) OR TITLE-ABS-KEY ( maori\* OR aboriginal\* OR indigenous\* ) OR TITLE-ABS-KEY ( "torres strait islander" OR atsi OR aotearoa\* ))) AND (( TITLE-ABS-KEY ( "cardiovascular disease\*" OR "cardiovascular" OR cvd ) OR TITLE-ABS-KEY ( "heart disease\*" OR "coronary disease\*" OR "coronary heart disease\*" ) OR TITLE-ABS-KEY ( "myocardial infarction\*" OR "heart attack\*" OR stroke OR "heart failure" ) OR TITLE-ABS-KEY ( "coronary artery disease" OR "myocardial ischemia" OR "myocardial ischaemia" OR "hypertensive heart disease\*" ) OR TITLE-ABS-KEY ( "angina" OR "angina pectoris" OR "vascular disease\*" ) OR TITLE-ABS-KEY ( "(Cardiovascular or cardio-vascular) adj3 (disease\* or disorder\* or condition\*)" ) OR TITLE-ABS-KEY ( "(Coronary or heart or cardiac or myocardi\*) adj3 (disease\* or disorder\* or condition\* or infarct\*)" ) OR TITLE-ABS-KEY ( "brain ischemia" OR "brain ischaemia" OR "cerebrovascular accident\*" )))

## S1d. Web of Science from the earliest record to 21st June 2020

| Set | Results   | Save History / Create Alert                                                                                                                                                                                                                                                                                                                                                                                                                                                                                                                                                                                                                                                                                                                                                                                                                                                                                            | Open Saved History | Edit Sets | Combine Sets<br><input type="radio"/> AND <input type="radio"/> OR<br>Combine | Delete Sets<br>Select All<br>Delete |
|-----|-----------|------------------------------------------------------------------------------------------------------------------------------------------------------------------------------------------------------------------------------------------------------------------------------------------------------------------------------------------------------------------------------------------------------------------------------------------------------------------------------------------------------------------------------------------------------------------------------------------------------------------------------------------------------------------------------------------------------------------------------------------------------------------------------------------------------------------------------------------------------------------------------------------------------------------------|--------------------|-----------|-------------------------------------------------------------------------------|-------------------------------------|
| # 7 | 168       | #5 AND #3 AND #2<br><i>Indexes=SCI-EXPANDED, SSCI, A&amp;HCI, CPCI-S, CPCI-SSH, BKCI-S, BKCI-SSH, ESCI, CCR-EXPANDED, IC Timespan=All years</i>                                                                                                                                                                                                                                                                                                                                                                                                                                                                                                                                                                                                                                                                                                                                                                        |                    | Edit      | <input type="checkbox"/>                                                      | <input type="checkbox"/>            |
| # 6 | 82        | #5 AND #4<br><i>Indexes=SCI-EXPANDED, SSCI, A&amp;HCI, CPCI-S, CPCI-SSH, BKCI-S, BKCI-SSH, ESCI, CCR-EXPANDED, IC Timespan=All years</i>                                                                                                                                                                                                                                                                                                                                                                                                                                                                                                                                                                                                                                                                                                                                                                               |                    | Edit      | <input type="checkbox"/>                                                      | <input type="checkbox"/>            |
| # 5 | 1,567,406 | <b>TOPIC:</b> ("cardiovascular disease*" OR "cardiovascular" OR CVD) OR <b>TOPIC:</b> ("heart disease*" OR "coronary disease*" OR "coronary heart disease*") OR <b>TOPIC:</b> ("myocardial infarction*" OR "heart attack*" OR stroke OR "heart failure") OR <b>TOPIC:</b> ("coronary artery disease" OR "myocardial ischemia" OR "myocardial ischaemia" OR "hypertensive heart disease*") OR <b>TOPIC:</b> ("angina" OR "angina pectoris" OR "vascular disease*") OR <b>TOPIC:</b> ("(Cardiovascular or cardio-vascular) adj3 (disease* or disorder* or condition*) ") OR <b>TOPIC:</b> ("(Coronary or heart or cardiac or myocardi*) adj3 (disease* or disorder* or condition* or infarct*) ") OR <b>TOPIC:</b> ("brain ischemia" OR "brain ischaemia" OR "cerebrovascular accident*")<br><i>Indexes=SCI-EXPANDED, SSCI, A&amp;HCI, CPCI-S, CPCI-SSH, BKCI-S, BKCI-SSH, ESCI, CCR-EXPANDED, IC Timespan=All years</i> |                    | Edit      | <input type="checkbox"/>                                                      | <input type="checkbox"/>            |
| # 4 | 1,498     | #3 AND #2 AND #1<br><i>Indexes=SCI-EXPANDED, SSCI, A&amp;HCI, CPCI-S, CPCI-SSH, BKCI-S, BKCI-SSH, ESCI, CCR-EXPANDED, IC Timespan=All years</i>                                                                                                                                                                                                                                                                                                                                                                                                                                                                                                                                                                                                                                                                                                                                                                        |                    | Edit      | <input type="checkbox"/>                                                      | <input type="checkbox"/>            |
| # 3 | 602,203   | TS=(australia* OR "new zealand*") OR TS=(maori* OR aboriginal* OR indigenous*) OR TS=("torres strait islander" OR atsi OR aotearoa*)<br><i>Indexes=SCI-EXPANDED, SSCI, A&amp;HCI, CPCI-S, CPCI-SSH, BKCI-S, BKCI-SSH, ESCI, CCR-EXPANDED, IC Timespan=All years</i>                                                                                                                                                                                                                                                                                                                                                                                                                                                                                                                                                                                                                                                    |                    | Edit      | <input type="checkbox"/>                                                      | <input type="checkbox"/>            |
| # 2 | 230,539   | <b>TOPIC:</b> ("social* isolat*" OR "social* interact*" OR "social* support*") OR <b>TOPIC:</b> ("social* disconnect*" OR "social* separat*" OR "social* segregat*") OR <b>TOPIC:</b> ("social* exclu*" OR "social* distan*" OR "social* marginalis*") OR <b>TOPIC:</b> ("social* alienat*" OR "social* communicat*" OR "social* divid*") OR <b>TOPIC:</b> ("social* seclu*" OR "social* detach*" OR "support system") OR <b>TOPIC:</b> ("support network" OR "loneliness" OR "solitude") OR <b>TOPIC:</b> ("psychosocial deprivation" OR "social participation" OR "community participation") OR <b>TOPIC:</b> ("social* cohesi*" OR "social* tie*" OR "social* embedd*") OR <b>TOPIC:</b> ("community integration" OR "social* integrat*")<br><i>Indexes=SCI-EXPANDED, SSCI, A&amp;HCI, CPCI-S, CPCI-SSH, BKCI-S, BKCI-SSH, ESCI, CCR-EXPANDED, IC Timespan=All years</i>                                            |                    | Edit      | <input type="checkbox"/>                                                      | <input type="checkbox"/>            |
| # 1 | 3,508,781 | TS=("old* adult*" OR aged OR elderly OR "Aged 65") OR TS=("late adult*" OR geriatrics OR "geriatric community" OR "geriatric population") OR TS=("aged 80, and over" OR "frail elderly") OR TS=("old* citizen*1" OR "senior citizen*")<br><i>Indexes=SCI-EXPANDED, SSCI, A&amp;HCI, CPCI-S, CPCI-SSH, BKCI-S, BKCI-SSH, ESCI, CCR-EXPANDED, IC Timespan=All years</i>                                                                                                                                                                                                                                                                                                                                                                                                                                                                                                                                                  |                    | Edit      | <input type="checkbox"/>                                                      | <input type="checkbox"/>            |
|     |           |                                                                                                                                                                                                                                                                                                                                                                                                                                                                                                                                                                                                                                                                                                                                                                                                                                                                                                                        |                    |           | <input type="radio"/> AND <input type="radio"/> OR<br>Combine                 | Select All<br>Delete                |

## Supplementary S2: Studies awaiting classification

Beath, A., et al. (2011). "Clinical predictors of outcome in acute ischaemic stroke patients treated with intravenous tissue plasminogen activator (tPA)." *International Journal of Stroke* 6: 4.

Long, P. W., et al. (2001). "Facilitating best practice: Transferring the lessons of the Clinical Support Systems Program." *Journal of Quality in Clinical Practice* 21(4): 157-159.

McDonnell, M. N. (2010). "Management of cognitive impairment following stroke: An audit of australian rehabilitation units." *Cerebrovascular Diseases* 29(SUPPL. 2): 69.

McLachlan, A., et al. (2010). "Nurse led quality improvement initiatives improving uptake of cardiac rehabilitation." *Heart Lung and Circulation* 19(SUPPL. 2): S245-S246.

Nilsson, M. and T. Linden (2009). "Multimodal sensory stimulation in stroke rehabilitation: The culture and brain health project." *International Journal of Stroke* 4(SUPPL. 1): 19.

Power, L. and M. Kennedy-Jones (2015). "The experience of early supported discharge for stroke survivors." *International Journal of Stroke* 10(SUPPL. 3): 75.

Riddell, T. (2011). "Inequities in Maori cardiovascular health require combined population and clinical health responses." *Heart Lung and Circulation* 20(SUPPL. 1): S4.

Sanders, L., et al. (2009). "An alternative outpatient based model of transient ischaemia attack management - The Monash TIA triaging treatment system." *International Journal of Stroke* 4(SUPPL. 1): 11.

Zecchin, R., et al. (2016). "Cardiac rehabilitation for patients with spontaneous coronary artery dissection." *Heart Lung and Circulation* 25(Supplement 2): S324.

### Supplementary S3: Excluded Papers

| Study            | Title                                                                                                                              | DOI                       | Source      | Exclusion Reason |
|------------------|------------------------------------------------------------------------------------------------------------------------------------|---------------------------|-------------|------------------|
| Abbott<br>2010   | Barriers and enhancers to dietary behaviour change for Aboriginal people attending a diabetes cooking course                       |                           | Main search | 02. Not CVD;     |
| Abimbola<br>2019 | The NASSS framework for ex post theorisation of technology-supported change in healthcare: Worked example of the TORPEDO programme | 10.1186/s12916-019-1463-x | Main search | 03. Not SH;      |
| Adams<br>2009    | Effects of area deprivation on health risks and outcomes: a multilevel, cross-sectional, Australian population study               | 10.1007/s00038-009-7113-x | Main search | 03. Not SH;      |

|            |                                                                                                                                                      |                               |             |                           |
|------------|------------------------------------------------------------------------------------------------------------------------------------------------------|-------------------------------|-------------|---------------------------|
| Albarqouni | External validation and comparison of four cardiovascular risk prediction models with data from the Australian Diabetes, Obesity and Lifestyle study | 10.5694/mja2.12061            | Main search | 03. Not SH;               |
| 2019       |                                                                                                                                                      |                               |             | 04. CVD & SH              |
| Alfonso    | Perception of worsening health predicts mortality in older men: The Health in Men Study (HIMS)                                                       | 10.1016/j.archger.2012.04.005 | Main search | mentioned but no outcome; |
| 2012       |                                                                                                                                                      |                               |             | 07. Outcome               |
| Al-Ganmi   | Medication adherence and predictive factors in patients with cardiovascular disease: A cross-sectional study                                         | 10.1111/nhs.12681             | Main search | not hospital utilisation  |
| Allen      | Quality of life impact of cardiovascular and affective conditions among older residents from urban and rural communities                             | 10.1186/1477-7525-11-140      | Main search | 04. CVD & SH              |
| 2013       |                                                                                                                                                      |                               |             |                           |

mentioned

but no

outcome;

|                     |                                                                                                        |                               |             |                                                    |
|---------------------|--------------------------------------------------------------------------------------------------------|-------------------------------|-------------|----------------------------------------------------|
| Allisey<br>2016     | An application of an extended effort-reward imbalance model to<br>police absenteeism behaviour         | 10.1108/pr-06-2014-<br>0125   | Main search | 02. Not CVD;                                       |
| Almei<br>da<br>2005 | Depression and smoking amongst older general practice<br>patients                                      | 10.1016/j.jad.2005.02.0<br>14 | Main search | 02. Not CVD;                                       |
| Almei<br>da<br>2011 | A practical approach to assess depression risk and to guide risk<br>reduction strategies in later life | 10.1017/S10416102100<br>01870 | Main search | 04. CVD &<br>SH<br>mentioned<br>but no<br>outcome; |



|       |                                                                 |                         |             |           |
|-------|-----------------------------------------------------------------|-------------------------|-------------|-----------|
| Almei |                                                                 |                         |             | 04. CVD & |
| da    | Complaints of difficulty to fall asleep increase the risk of    | 10.1016/j.jad.2011.05.0 | Main search | SH        |
| 2011  | depression in later life: the health in men study               | 45                      |             | mentioned |
|       |                                                                 |                         |             | but no    |
|       |                                                                 |                         |             | outcome;  |
|       |                                                                 |                         |             | 04. CVD & |
| Almei | Cardiovascular disease, depression and mortality: the Health In | 10.1097/JGP.0b013e31    | Main search | SH        |
| da    | Men Study                                                       | 8211c1ed                |             | mentioned |
| 2012  |                                                                 |                         |             | but no    |
|       |                                                                 |                         |             | outcome;  |
| Almei | Cardiovascular diseases do not influence the mental health      | 10.1016/j.jad.2012.06.0 | Main search | 04. CVD & |
| da    | outcome of older men with depression over 6 years               | 43                      |             | SH        |
| 2013  |                                                                 |                         |             | mentioned |

|       |                                                                                    |             |           |
|-------|------------------------------------------------------------------------------------|-------------|-----------|
|       |                                                                                    |             | but no    |
|       |                                                                                    |             | outcome;  |
|       |                                                                                    |             | 04. CVD & |
| Ander |                                                                                    |             | SH        |
| son   | A population-based assessment of the impact and burden of caregiving for long-term | Main search | mentioned |
| 1995  | stroke survivors                                                                   |             | but no    |
|       |                                                                                    |             | outcome;  |
|       |                                                                                    |             | 04. CVD & |
| Ander |                                                                                    |             | SH        |
| son   | Validation of the Short Form 36 (SF-36) health survey questionnaire among stroke   | Main search | mentioned |
| 1996  | patients                                                                           |             | but no    |
|       |                                                                                    |             | outcome;  |

|                      |                                                                                                                                                                                        |                                      |             |                                       |
|----------------------|----------------------------------------------------------------------------------------------------------------------------------------------------------------------------------------|--------------------------------------|-------------|---------------------------------------|
| Ander<br>son<br>2004 | The postmodern heart: War veterans' experiences of invasive cardiac technology                                                                                                         | 10.1111/j.1365-<br>2648.2004.02985.x | Main search | 04. CVD &                             |
|                      |                                                                                                                                                                                        |                                      |             | SH<br>mentioned<br>but no<br>outcome; |
| Ander<br>son<br>2006 | The effects of a multimodal intervention trial to promote lifestyle factors associated with the prevention of cardiovascular disease in menopausal and postmenopausal Australian women | 10.1080/073993305005<br>06543        | Main search | 04. CVD &                             |
|                      |                                                                                                                                                                                        |                                      |             | SH<br>mentioned<br>but no<br>outcome; |
| Andre<br>w 2013      | Differences in long-term unmet needs between younger and older stroke survivors                                                                                                        | 10.1159/000353129                    | Main search | 07. Outcome                           |
|                      |                                                                                                                                                                                        |                                      |             | not hospital<br>utilisation           |

|                 |                                                                                      |                    |             |                          |
|-----------------|--------------------------------------------------------------------------------------|--------------------|-------------|--------------------------|
| Andre<br>w 2013 | Long-term unmet needs of community dwelling stroke survivors and carers in Australia | 10.1159/000353129  | Main search | 07. Outcome              |
|                 |                                                                                      |                    |             | not hospital utilisation |
| Andre<br>w 2013 | Understanding the factors associated with unmet needs in Australian stroke survivors | 10.1111/ijbs.12142 | Main search | 07. Outcome              |
|                 |                                                                                      |                    |             | not hospital utilisation |
| Andre<br>w 2013 | The impact of stroke survivor disability on the long-term needs of carers            | 10.1111/ijbs.12172 | Main search | 04. CVD &<br>SH          |
|                 |                                                                                      |                    |             | mentioned                |
|                 |                                                                                      |                    |             | but no outcome;          |

|                       |                                                                                                                                    |                                  |             |                                                    |
|-----------------------|------------------------------------------------------------------------------------------------------------------------------------|----------------------------------|-------------|----------------------------------------------------|
| Andre<br>w 2014       | Understanding long-term unmet needs in Australian survivors<br>of stroke                                                           | 10.1111/ijbs.12325               | Main search | 07. Outcome<br>not hospital<br>utilisation         |
| Aoun<br>2017          | Bereavement support for family caregivers: The gap between<br>guidelines and practice in palliative care                           | 10.1371/journal.pone.<br>0184750 | Main search | 02. Not CVD                                        |
| Armst<br>rong<br>2012 | Living with aphasia: three Indigenous Australian stories                                                                           | 10.3109/17549507.201<br>1.663790 | Main search | 02. Not CVD;                                       |
| Arndt<br>2009         | "Others had similar problems and you were not alone":<br>Evaluation of an open-group mutual aid model in cardiac<br>rehabilitation | 10.1097/JCN.0b013e31<br>81a1c236 | Main search | 04. CVD &<br>SH<br>mentioned<br>but no<br>outcome; |

|                |                                                                                                                                                                    |                                     |             |              |
|----------------|--------------------------------------------------------------------------------------------------------------------------------------------------------------------|-------------------------------------|-------------|--------------|
| Arroll<br>2009 | Managing Cardiovascular Risk in the Future                                                                                                                         | 10.1002/978144430335<br>3.ch12      | Main search | 03. Not SH;  |
| Aslani<br>2011 | A community pharmacist delivered adherence support service for dyslipidaemia                                                                                       | 10.1093/eurpub/ckq11<br>8           | Main search | 02. Not CVD; |
| Aspin<br>2012  | Strategic approaches to enhanced health service delivery for Aboriginal and Torres Strait Islander people with chronic illness:<br>A qualitative study             | 10.1186/1472-6963-12-<br>143        | Main search | 02. Not CVD; |
| Astley<br>2011 | Health resource variability in the achievement of optimal performance and clinical outcome                                                                         | 10.1161/CIRCOUTCO<br>MES.110.960229 | Main search | 03. Not SH;  |
| Attard<br>2012 | The comparative effects of multi-modality aphasia therapy and constraint-induced aphasia therapy-plus treatments for severe chronic Broca's aphasia: A pilot study |                                     | Main search | 02. Not CVD  |

|                   |                                                                                                                                                                           |                              |             |                                                    |
|-------------------|---------------------------------------------------------------------------------------------------------------------------------------------------------------------------|------------------------------|-------------|----------------------------------------------------|
| Azzopardi<br>2009 | Health-Related Quality of Life 2 Years After Coronary Artery Bypass Graft Surgery                                                                                         | 10.1097/JCN.0b013e31819b2125 | Main search | 04. CVD &<br>SH<br>mentioned<br>but no<br>outcome; |
|                   |                                                                                                                                                                           |                              |             |                                                    |
| Badcock 2018      | Loneliness in psychotic illness and its association with cardiometabolic disorders                                                                                        | 10.1016/j.schres.2018.09.021 | Main search | 02. Not CVD;                                       |
| Badcock 2019      | Loneliness in psychotic illness and its association with cardiometabolic disorders                                                                                        | 10.1016/j.schres.2018.09.021 | Main search | 02. Not CVD;                                       |
| Bagot 2017        | Integrating acute stroke telemedicine consultations into specialists' usual practice: a qualitative analysis comparing the experience of Australia and the United Kingdom | 10.1186/s12913-017-2694-1    | Main search | 04. CVD &<br>SH<br>mentioned                       |



but no  
outcome;

|                  |                                                                                                                                                   |                               |             |                                            |
|------------------|---------------------------------------------------------------------------------------------------------------------------------------------------|-------------------------------|-------------|--------------------------------------------|
| Bailie<br>2017   | Improving preventive health care in Aboriginal and Torres Strait<br>Islander primary care settings                                                | 10.1186/s12992-017-<br>0267-z | Main search | 02. Not CVD;                               |
| Baker<br>2019    | Risk factors for acute rheumatic fever: Literature review and<br>protocol for a case-control study in New Zealand                                 | 10.3390/ijerph1622451<br>5    | Main search | 06.Review;                                 |
| Bannin<br>k 2006 | Web-based assessment of cardiovascular disease risk in routine primary care practice in<br>New Zealand: The first 18,000 patients (PREDICT CVD-1) |                               | Main search | 03. Not SH;                                |
| Barker<br>2005   | Upper limb recovery after stroke: the stroke survivors' perspective                                                                               |                               | Main search | 07. Outcome<br>not hospital<br>utilisation |
| Bean<br>2007     | Ethnic differences in illness perceptions, self-efficacy and<br>diabetes self-care                                                                | 10.1080/147683206009<br>76240 | Main search | 02. Not CVD;                               |

|                        |                                                                                                                                                           |                                      |             |                      |
|------------------------|-----------------------------------------------------------------------------------------------------------------------------------------------------------|--------------------------------------|-------------|----------------------|
| Beard<br>2009          | Influence of socioeconomic and cultural factors on rural health                                                                                           | 10.1111/j.1440-<br>1584.2008.01030.x | Main search | 02. Not CVD;         |
| Beckle<br>y 2007       | The influence of the quality and quantity of social support in the<br>promotion of community participation following stroke                               | 10.1111/j.1440-<br>1630.2007.00643.x | Main search | 01. Not<br>AUS/NZ;   |
| Beesle<br>y 2011       | Art after stroke: the qualitative experience of community<br>dwelling stroke survivors in a group art programme                                           | 10.3109/09638288.201<br>1.571333     | Main search | 05.<br>Intervention; |
| Bertor<br>elli<br>2015 | Bertorelli, D. (2015). "From the mind to the heart: Cardio-psychiatry or psycho-<br>cardiology?" Australian and New Zealand Journal of Psychiatry 49: 75. |                                      | Main search | 03. Not SH;          |
| Billah<br>2014         | AusSCORE II in predicting 30-day mortality after isolated<br>coronary artery bypass grafting in Australia and New Zealand                                 | 10.1016/j.jtcvs.2014.02<br>.027      | Main search | 03. Not SH;          |

|                   |                                                                                                                                                                     |                                        |             |                                 |
|-------------------|---------------------------------------------------------------------------------------------------------------------------------------------------------------------|----------------------------------------|-------------|---------------------------------|
| Blacke<br>r 2010  | Evaluation of the effectiveness of an acceptance and<br>commitment therapy (ACT) group program to improve coping<br>and quality of life for individuals post stroke | 10.1111/j.1747-<br>4949.2010.00458-4.x | Main search | 05.<br>Intervention;            |
|                   |                                                                                                                                                                     |                                        |             | 04. CVD &<br>SH                 |
| Blacke<br>r 2019  | Indigenous stroke care: differences, challenges and a need for<br>change                                                                                            | 10.1111/imj.14399                      | Main search | mentioned<br>but no<br>outcome; |
| Blomqvist<br>2018 | Enabling healthy living: Experiences of people with severe<br>mental illness in psychiatric outpatient services                                                     | 10.1111/inm.12313                      | Main search | 02. Not CVD;                    |

|                    |                                                                                                                                                                                                                                           |                                  |             |              |
|--------------------|-------------------------------------------------------------------------------------------------------------------------------------------------------------------------------------------------------------------------------------------|----------------------------------|-------------|--------------|
| Bogomolova<br>2018 | Dietary intervention for people with mental illness in South Australia                                                                                                                                                                    | 10.1093/heapro/daw055            | Main search | 02. Not CVD; |
|                    | Implementing cardiovascular disease prevention guidelines to translate evidence-based medicine and shared decision making into general practice: Theory-based intervention development, qualitative piloting and quantitative feasibility |                                  |             |              |
| Bonner<br>2019     |                                                                                                                                                                                                                                           | 10.1186/s13012-019-0927-x        | Main search | 03. Not SH;  |
| Booth<br>1997      | Physical activity preferences, preferred sources of assistance, and perceived barriers to increased activity among physically inactive Australians                                                                                        |                                  | Main search | 02. Not CVD; |
| Boult<br>2011      | Developing tools to predict outcomes following cardiovascular surgery                                                                                                                                                                     | 10.1111/j.1445-2197.2010.05644.x | Main search | 03. Not SH;  |

|                   |                                                                                                                                                                                                                                                     |                           |             |             |
|-------------------|-----------------------------------------------------------------------------------------------------------------------------------------------------------------------------------------------------------------------------------------------------|---------------------------|-------------|-------------|
| Bradshaw<br>2015  | Validation study of GRACE risk scores in indigenous and non-indigenous patients hospitalized with acute coronary syndrome                                                                                                                           | 10.1186/s12872-015-0138-6 | Main search | 03. Not SH; |
| Bramley<br>2004   | A call to action on Maori cardiovascular health                                                                                                                                                                                                     |                           | Main search | 03. Not SH; |
| Brauer<br>2018    | Improving physical activity after stroke via treadmill training and self management (IMPACT): A protocol for a randomised controlled trial                                                                                                          | 10.1186/s12883-018-1015-6 | Main search | 03. Not SH; |
| Brazionis<br>2017 | An evaluation of the telehealth facilitation of diabetes and cardiovascular care in remote Australian Indigenous communities: - protocol for the telehealth eye and associated medical services network [TEAMSnet] project, a pre-post study design | 10.1186/s12913-016-1967-4 | Main search | 02. Not CVD |

|                |                                                                                                                                                                |                                  |             |                                                    |
|----------------|----------------------------------------------------------------------------------------------------------------------------------------------------------------|----------------------------------|-------------|----------------------------------------------------|
| Broad<br>2007  | Zero end-digit preference in recorded blood pressure and its impact on classification of patients for pharmacologic management in primary care - PREDICT-CVD-6 | 10.3399/096016407782<br>317964   | Main search | 03. Not SH;                                        |
| Brod<br>y 2007 | Rates of depression at 3 and 15 months poststroke and their relationship with cognitive decline: The Sydney stroke study                                       | 10.1097/JGP.0b013e31<br>80590bca | Main search | 07. Outcome<br>not hospital<br>utilisation         |
| Brown<br>2006  | Uncovering the determinants of cardiovascular disease among Indigenous people                                                                                  | 10.1080/135578505004<br>85485    | Main search | 04. CVD &<br>SH<br>mentioned<br>but no<br>outcome; |
| Brown<br>2013  | Making a good time": The role of friendship in living successfully with aphasia                                                                                | 10.3109/17549507.201<br>2.692814 | Main search | 02. Not CVD;                                       |

|                        |                                                                                                                                                |                                      |             |                      |
|------------------------|------------------------------------------------------------------------------------------------------------------------------------------------|--------------------------------------|-------------|----------------------|
| Brundi<br>sini<br>2013 | Chronic disease patients' experiences with accessing health care in rural and remote areas: a systematic review and qualitative meta-synthesis |                                      | Main search | 01. Not<br>AUS/NZ;   |
| Bulma<br>n 2011        | Mibbinbah and spirit healing: Fostering safe, friendly spaces for indigenous males in Australia                                                | 10.3149/jmh.1001.6                   | Main search | 02. Not CVD;         |
| Bunani<br>2012         | The association between social support and psychosocial factors upon mortality and quality of life                                             | 10.1111/j.1440-<br>1797.2012.01633.x | Main search | 01. Not<br>AUS/NZ;   |
| Bunke<br>r 2003        | "Stress" and coronary heart disease: psychosocial risk factors                                                                                 |                                      | Main search | 06.Review;           |
| Burges<br>s 2015       | Strengthening Cardiovascular Disease Prevention in Remote Indigenous Communities in Australia's Northern Territory                             | 10.1016/j.hlc.2014.11.0<br>08        | Main search | 05.<br>Intervention; |



|                  |                                                                                                                  |                                            |             |                                                                    |
|------------------|------------------------------------------------------------------------------------------------------------------|--------------------------------------------|-------------|--------------------------------------------------------------------|
| Butlan<br>d 2019 | Health behaviours of rural Australians following percutaneous coronary intervention: a systematic scoping review | 10.22605/RRH4854                           | Main search | 06.Review;                                                         |
| Byard<br>2002    | Incapacitation or death of a socially isolated parent or carer could result in the death of dependent children   | 10.1046/j.1440-1754.2002.00025.x           | Main search | 02. Not CVD;<br><br>04. CVD &<br><br>SH                            |
| Byles<br>2014    | PSYCHOLOGICAL DISTRESS AND COMORBID PHYSICAL CONDITIONS: DISEASE OR DISABILITY?                                  | 10.1002/da.22162                           | Main search | mentioned<br><br>but no<br><br>outcome;<br><br>04. CVD &<br><br>SH |
| Byles<br>2015    | Long-term survival of older australian women with a history of stroke                                            | 10.1016/j.jstrokecerebrovasdis.2014.07.040 | Main search | SH<br><br>mentioned                                                |

but no  
outcome;

Cadde  
n 2007  
Educating nurses about cardiac monitoring in a stroke unit

Main search 03. Not SH;

Cadilh  
ac 2017  
Improving discharge care: The potential of a new organisational  
intervention to improve discharge after hospitalisation for acute  
stroke, a controlled before-after pilot study

10.1136/bmjopen-  
2017-016010

Main search 05.  
Intervention;

Camer  
on  
2008

07. Outcome  
not hospital  
utilisation

References

Camer  
on  
2010  
Does cognitive impairment predict poor self-care in patients  
with heart failure?

10.1093/eurjhf/hfq042

Main search 04. CVD &  
SH  
mentioned

but no

outcome;

07. Outcome

not hospital

utilisation

07. Outcome

not hospital

utilisation

04. CVD &

SH

mentioned

but no

outcome;

Camer

on

2016

Psychosocial adjustment of patients living with an internal  
cardioverter defibrillator

10.1093/eurheartj/eh  
w433

Main search

Camer

on

2016

Carers' views on patient self-care in chronic heart failure

10.1111/jocn.13124

Main search

Camp

bell

1994

Disease, impairment, disability and social handicap: A  
community based study of people aged 70 years and Over

10.3109/096382894091  
66015

Main search

|                  |                                                                                                                                                                                     |                            |             |                              |
|------------------|-------------------------------------------------------------------------------------------------------------------------------------------------------------------------------------|----------------------------|-------------|------------------------------|
| Canuto 2011      | Study protocol: a pragmatic randomised controlled trial of a 12-week physical activity and nutritional education program for overweight Aboriginal and Torres Strait Islander women | 10.1186/1471-2458-11-655   | Main search | 02. Not CVD;                 |
| Cape 1994        | The influence of clinical problems, age and social support on outcomes for elderly persons referred to regional aged care assessment teams                                          |                            | Main search | 02. Not CVD;                 |
| Caperchione 2011 | Physical activity behaviours of Culturally and Linguistically Diverse (CALD) women living in Australia: a qualitative study of socio-cultural influences                            | 10.1186/1471-2458-11-26    | Main search | 02. Not CVD;                 |
| Caspi 2006       | Socially isolated children 20 years later - Risk of cardiovascular disease                                                                                                          | 10.1001/archpedi.160.8.805 | Main search | 02. Not CVD;                 |
| Cassel 1974      | Hypertension and cardiovascular disease in migrants: a potential source of clues?                                                                                                   |                            | Main search | 04. CVD &<br>SH<br>mentioned |

but no  
outcome;

Chan Ethnic and socioeconomic disparities in the prevalence of cardiovascular disease in New  
1285 Zealand

Main search 03. Not SH;

04. CVD &  
SH

Chan Ethnic and socioeconomic disparities in the prevalence of 10.1136/bmj.39455.596  
2008 cardiovascular disease in New Zealand 181.25

Main search mentioned  
but no  
outcome;

07. Outcome  
not hospital  
utilisation

Cheok  
2003

References

|               |                                                                                                                                                 |                                  |             |                           |
|---------------|-------------------------------------------------------------------------------------------------------------------------------------------------|----------------------------------|-------------|---------------------------|
|               | Identification, course, and treatment of depression after                                                                                       |                                  |             | 07. Outcome               |
| Cheok<br>2003 | admission for a cardiac condition: Rationale and patient characteristics for the Identifying Depression As a Comorbid Condition (IDACC) project | 10.1016/s0002-8703(03)00481-2    | Main search | not hospital utilisation  |
| Clark<br>1998 | The effects of depression and abnormal illness behaviour on outcome following rehabilitation from stroke                                        | 10.1191/026921598669567216       | Main search | 03. Not SH;               |
| Clark<br>1999 | Psychological correlates of outcome following rehabilitation from stroke                                                                        | 10.1191/026921599673399613       | Main search | 03. Not SH;               |
|               |                                                                                                                                                 |                                  |             | 04. CVD &                 |
|               |                                                                                                                                                 |                                  |             | SH                        |
| Clark<br>1999 | Changes in family functioning for stroke rehabilitation patients and their families                                                             | 10.1097/00004356-199909000-00003 | Main search | mentioned but no outcome; |

|                  |                                                                                                                                                                                                                              |                                  |             |                      |
|------------------|------------------------------------------------------------------------------------------------------------------------------------------------------------------------------------------------------------------------------|----------------------------------|-------------|----------------------|
| Clark<br>2003    | A randomized controlled trial of an education and counselling intervention for families after stroke                                                                                                                         |                                  | Main search | 05.<br>Intervention; |
| Clark<br>2010    | Home based cardiac rehabilitation                                                                                                                                                                                            | 10.1136/bmj.b5510                | Main search | 06.Review;           |
| Clark<br>2015    | Development and feasibility testing of an education program to improve knowledge and self-care among Aboriginal and Torres Strait Islander patients with heart failure                                                       |                                  | Main search | 03. Not SH;          |
| Cleland<br>2010  | Individual, social and environmental correlates of physical activity among women living in socioeconomically disadvantaged neighbourhoods                                                                                    | 10.1016/j.socscimed.2010.02.028  | Main search | 02. Not CVD;         |
| Courtnay<br>2009 | Fewer Emergency Readmissions and Better Quality of Life for Older Adults at Risk of Hospital Readmission: A Randomized Controlled Trial to Determine the Effectiveness of a 24-Week Exercise and Telephone Follow-Up Program | 10.1111/j.1532-5415.2009.02138.x | Main search | 05.<br>Intervention; |



|                 |                                                                                                                                                         |                                              |             |                                         |
|-----------------|---------------------------------------------------------------------------------------------------------------------------------------------------------|----------------------------------------------|-------------|-----------------------------------------|
| Cruice<br>2010  | Health-related quality of life in people with aphasia:<br>Implications for fluency disorders quality of life research                                   | 10.1016/j.jfludis.2010.<br>05.008            | Main search | 02. Not CVD;<br><br>04. CVD &<br><br>SH |
| Daly<br>2000    | Health status, perceptions of coping, and social support immediately after discharge of<br>survivors of acute myocardial infarction                     |                                              | Main search | mentioned<br><br>but no<br><br>outcome; |
| Danes<br>e 2009 | Adverse childhood experiences and adult risk factors for age-<br>related disease: depression, inflammation, and clustering of<br>metabolic risk markers | 10.1001/archpediatric<br>s.2009.214          | Main search | 02. Not CVD;<br><br>04. CVD &<br><br>SH |
| Daniel<br>2011  | Environmental risk conditions and pathways to cardiometabolic<br>diseases in indigenous populations                                                     | 10.1146/annurev.publ<br>health.012809.103557 | Main search | mentioned                               |

but no  
outcome;

Davids  
on Identifying the communication activities of older people with aphasia: Evidence from  
2003 naturalistic observation

Main search 02. Not CVD;

04. CVD &

Davids  
on Integrated, collaborative palliative care in heart failure: the St. George Heart Failure  
2004 Service experience 1999-2002

Main search SH  
mentioned

but no  
outcome;

Davids  
on Activities of home-based heart failure nurse specialists: a modified narrative analysis  
2005

Main search 04. CVD &  
SH  
mentioned

but no  
outcome;

|                      |                                                                                                                                              |                                 |             |                      |
|----------------------|----------------------------------------------------------------------------------------------------------------------------------------------|---------------------------------|-------------|----------------------|
| Davids<br>on<br>2006 | Social communication in older age: Lessons from people with aphasia                                                                          | 10.1310/0GGQ-CJDX-<br>N2BR-W7W4 | Main search | 02. Not CVD;         |
| Davids<br>on<br>2008 | Social participation for older people with aphasia: The impact of communication disability on friendships                                    | 10.1310/tsr1504-325             | Main search | 02. Not CVD;         |
| Dean<br>2009         | Exercise intervention to prevent falls and enhance mobility in community dwellers after stroke: a protocol for a randomised controlled trial | 10.1186/1471-2377-9-<br>38      | Main search | 05.<br>Intervention; |

|                  |                                                                                                                                                        |                                  |             |                                       |
|------------------|--------------------------------------------------------------------------------------------------------------------------------------------------------|----------------------------------|-------------|---------------------------------------|
| Dean<br>2014     | Treadmill training provides greater benefit to the subgroup of community-dwelling people after stroke who walk faster than 0.4 m/s: a randomised trial | 10.1016/j.jphys.2014.03.004      | Main search | 05.<br>Intervention;                  |
|                  |                                                                                                                                                        |                                  |             | 04. CVD &                             |
| Dengle<br>r 2011 | The heart beads program                                                                                                                                | 10.1111/j.1744-6155.2010.00273.x | Main search | SH<br>mentioned<br>but no<br>outcome; |
|                  |                                                                                                                                                        |                                  |             | 04. CVD &                             |
| Denha<br>m 2019  | "This is our life now. our new normal": A qualitative study of the unmet needs of carers of stroke survivors                                           | 10.1177/1747493019858233         | Main search | SH<br>mentioned<br>but no<br>outcome; |

|        |                                                                              |                       |             |              |
|--------|------------------------------------------------------------------------------|-----------------------|-------------|--------------|
| DiBen  |                                                                              |                       |             | 07. Outcome  |
| edetto |                                                                              |                       | References  | not hospital |
| 2007   |                                                                              |                       |             | utilisation  |
|        |                                                                              |                       |             | 04. CVD &    |
| DiBen  |                                                                              |                       |             | SH           |
| edetto | A biopsychosocial model for depressive symptoms following                    | 10.1080/088704409030  | Main search | mentioned    |
| 2010   | acute coronary syndromes                                                     | 19535                 |             | but no       |
|        |                                                                              |                       |             | outcome;     |
| Dollar |                                                                              |                       |             |              |
| d 2004 | Broadening the reach of cardiac rehabilitation to rural and remote Australia |                       | Main search | 06.Review;   |
|        |                                                                              |                       |             |              |
| D'Onis | Does an early childhood intervention affect cardiometabolic risk             | 10.1016/j.puhe.2012.0 |             |              |
| e 2012 | in adulthood? Evidence from a longitudinal study of preschool                | 4.012                 | Main search | 02. Not CVD; |
|        | attendance in South Australia                                                |                       |             |              |

|           |                                                                                                                               |                          |             |                                                    |
|-----------|-------------------------------------------------------------------------------------------------------------------------------|--------------------------|-------------|----------------------------------------------------|
| Dracup    | A nursing intervention to reduce prehospital delay in acute coronary syndrome: a randomized clinical trial                    |                          | Main search | 05.<br>Intervention;                               |
| 2006      |                                                                                                                               |                          |             |                                                    |
| Draper    | Stress in caregivers of aphasic stroke patients: A randomized controlled trial                                                | 10.1177/0269215506071251 | Main search | 05.<br>Intervention;                               |
| 2007      |                                                                                                                               |                          |             |                                                    |
| DuPlessis | Traversing the liminal: What can Fontan adults' transition experiences and perspectives teach us about optimizing healthcare? | 10.1515/ijamh-2018-0020  | Main search | 04. CVD &<br>SH<br>mentioned<br>but no<br>outcome; |
| 2018      |                                                                                                                               |                          |             |                                                    |
| Dyall     | Stroke: A picture of health disparities in New Zealand                                                                        |                          | Main search | 04. CVD &<br>SH<br>mentioned                       |
| 2008      |                                                                                                                               |                          |             |                                                    |

but no

outcome;

04. CVD &

SH

mentioned

but no

outcome;

01. Not

AUS/NZ;

03. Not SH;

|        |                                                                                   |                     |             |
|--------|-----------------------------------------------------------------------------------|---------------------|-------------|
| Issue  | Informal care and the self-management partnership:                                | 10.1071/AH09795     |             |
| 2010   | Implications for Australian health policy and practice                            | 10.1207/S15324796AB | Main search |
|        |                                                                                   | M2601-01            |             |
| Feibel |                                                                                   |                     | References  |
| 1982   |                                                                                   |                     |             |
| Ferry  |                                                                                   |                     |             |
| 2004   | Towards a safer culture: Clinical pathways in acute coronary syndromes and stroke |                     | Main search |

|               |                                                                                                                                                                                                                  |                     |             |                    |
|---------------|------------------------------------------------------------------------------------------------------------------------------------------------------------------------------------------------------------------|---------------------|-------------|--------------------|
| Field<br>2002 | A case study in strategic change: developing a strategic research program to address cardiovascular disease and related disorders in aboriginal and Torres Strait Islander peoples and rural and remote settings |                     | Main search | 03. Not SH;        |
| Filip<br>1988 | Filip J, Rubenfire M, Mosca L. Effect of gender and age on barriers to participation on cardiac rehabilitation following an acute myocardial infarction. CVD Prev 1998; 1:299 – 305.                             |                     | References  | 01. Not<br>AUS/NZ; |
| Finch<br>2017 | Undetected and underserved: The untold story of patients who had a minor stroke: Equity of access is particularly concerning for minor stroke                                                                    | 10.5694/mja16.01009 | Main search | 06.Review;         |
| Fini<br>2014  | How physically active are people following stroke?                                                                                                                                                               | 10.1111/ijvs.12297  | Main search | 06.Review;         |



|                       |                                                                                                                                                                                                |                                  |             |                      |
|-----------------------|------------------------------------------------------------------------------------------------------------------------------------------------------------------------------------------------|----------------------------------|-------------|----------------------|
| Friedla<br>nd<br>1987 | Friedland,J., & McColl, M. A. (1987). Social support and psychosocial dysfunction after stroke: Buffering effects in a community Archives of Physical Medicine and Rehabilitation. 68,475-480. |                                  | References  | 01. Not<br>AUS/NZ;   |
| Fullag<br>ar 2003     | Governing women's active leisure: The gendered effects of calculative rationalities within Australian health policy                                                                            | 10.1080/0958159031000100206      | Main search | 02. Not CVD;         |
| Gallag<br>her<br>2003 | Effects of a telephone counseling intervention on psychosocial adjustment in women following a cardiac event                                                                                   |                                  | Main search | 05.<br>Intervention; |
| Gallag<br>her<br>2012 | Weight management issues and strategies for people with high cardiovascular risk undertaking an Australian weight loss program: a focus group study                                            | 10.1111/j.1442-2018.2011.00651.x | Main search | 02. Not CVD;         |

|                   |                                                                                                                                         |                                     |             |                                            |
|-------------------|-----------------------------------------------------------------------------------------------------------------------------------------|-------------------------------------|-------------|--------------------------------------------|
| Gallagher<br>2016 | Quality of life, social support and cognitive impairment in heart failure patients without diagnosed dementia                           | 10.1111/ijn.12402                   | Main search | 07. Outcome<br>not hospital<br>utilisation |
| Garcia<br>2019    | The roles of dispositional coping style and social support in helping people with respiratory disease cope with a breathlessness crisis | 10.1111/jan.14039                   | Main search | 02. Not CVD;                               |
| Garofalo<br>2012  | Pre-hospital delay in acute coronary syndromes: PREDICT CVD-18                                                                          |                                     | Main search | 03. Not SH;                                |
| Gaskin<br>2015    | Parents experiences of going home with their infant following first stage cardiac surgery for single ventricle heart condition          | 10.1136/archdischild-2015-308599.20 | Main search | 01. Not<br>AUS/NZ;                         |
| Gaskin<br>2015    | Parents experiences of going home with their infant following first stage cardiac surgery for single ventricle heart condition          | 10.1136/archdischild-2015-308599.20 | Main search | 01. Not<br>AUS/NZ;                         |

|                 |                                                                                                                                               |                                     |             |                 |
|-----------------|-----------------------------------------------------------------------------------------------------------------------------------------------|-------------------------------------|-------------|-----------------|
| Gaskin<br>2015  | Transition from hospital to home: Psychosocial adaptation and adjustment in parents of infants with single ventricle heart conditions         | 10.1136/archdischild-2015-308599.11 | Main search | 01. Not AUS/NZ; |
| Gassner<br>2003 | Aerobic exercise and the post myocardial infarction patient: A review of the literature                                                       | 10.1016/S0147-9563(03)29000-3       | Main search | 03. Not SH;     |
| Gill<br>2016    | Feeling angry about current health status: using a population survey to determine the association with demographic, health and social factors | 10.1186/s12889-016-3232-5           | Main search | 02. Not CVD;    |
| Glikson<br>1995 | Social support, marital status and living arrangement correlates of cardiovascular disease risk factors in the elderly                        | 10.1016/0277-9536(95)2894-9         | Main search | 02. Not CVD;    |

|              |                                                                                                                                                                                |                               |             |                                         |
|--------------|--------------------------------------------------------------------------------------------------------------------------------------------------------------------------------|-------------------------------|-------------|-----------------------------------------|
|              |                                                                                                                                                                                |                               |             | 04. CVD &                               |
|              |                                                                                                                                                                                |                               |             | SH                                      |
| Glozier 2013 | Psychosocial risk factors for coronary heart disease                                                                                                                           |                               | Main search | mentioned<br><br>but no<br><br>outcome; |
|              |                                                                                                                                                                                |                               |             | 04. CVD &                               |
|              |                                                                                                                                                                                |                               |             | SH                                      |
| Glozier 2014 | The national heart foundation of Australia consensus statement on psychosocial risk factors for coronary heart disease                                                         | 10.1016/j.gheart.2014.03.1930 | Main search | mentioned<br><br>but no<br><br>outcome; |
| Gravenn 2011 | From rehabilitation to recovery: Protocol for a randomised controlled trial evaluating a goal-based intervention to reduce depression and facilitate participation post-stroke | 10.1186/1471-2377-11-73       | Main search | 05.<br><br>Intervention;                |

|                |                                                                                                                                                            |                               |             |                                         |
|----------------|------------------------------------------------------------------------------------------------------------------------------------------------------------|-------------------------------|-------------|-----------------------------------------|
| Graves<br>2009 | Cost-Effectiveness of an Intervention to Reduce Emergency Re-Admissions to Hospital among Older Patients                                                   | 10.1371/journal.pone.0007455  | Main search | 05.<br>Intervention;                    |
| Grey<br>2010   | A comparative analysis of cardiovascular disease risk profiles of five Pacific ethnic groups assessed in New Zealand primary care practice: PREDICT CVD-13 |                               | Main search | 03. Not SH;                             |
| Grohn<br>2012  | The first 3-months post-stroke: What facilitates successfully living with aphasia?                                                                         | 10.3109/17549507.2012.692813  | Main search | 02. Not CVD;<br><br>04. CVD &<br><br>SH |
| Gu<br>2016     | Identifying ehealth opportunities to support medication adherence - Findings of a focus group study                                                        | 10.3233/978-1-61499-645-3-150 | Main search | mentioned<br><br>but no<br><br>outcome; |

|                     |                                                                                                                                                            |                                |             |                                            |
|---------------------|------------------------------------------------------------------------------------------------------------------------------------------------------------|--------------------------------|-------------|--------------------------------------------|
| Hall<br>2015        | Improving longer term outcomes post stroke: Exploring the barriers and facilitators that influence unmet need, life quality and participation after stroke | 10.1111/ijbs.12585             | Main search | 01. Not<br>AUS/NZ;                         |
| Hamm<br>ash<br>2019 | Perceived control and quality of life among recipients of implantable cardioverter defibrillator                                                           | 10.1016/j.aucc.2018.08<br>.005 | Main search | 07. Outcome<br>not hospital<br>utilisation |
| Hamm<br>ond<br>2008 | Factors associated with persistent risk of depression in older people following discharge from an acute cardiac unit                                       | 10.1017/S10416102080<br>07138  | Main search | 07. Outcome<br>not hospital<br>utilisation |
| Hanco<br>ck<br>2017 | Rational clinical evaluation of suspected acute coronary syndromes: The value of more information                                                          | 10.1111/1742-<br>6723.12819    | Main search | 03. Not SH;                                |

|                   |                                                                                                                                            |                           |             |                      |
|-------------------|--------------------------------------------------------------------------------------------------------------------------------------------|---------------------------|-------------|----------------------|
| Hand<br>1996      | Older adults with lifelong intellectual handicap in New Zealand: prevalence, disabilities and implications for regional health authorities |                           | Main search | 02. Not CVD;         |
| Harris<br>2010    | How do we manage patients who become unemployed?<br><br>Randomised controlled trial of a secondary prevention program                      |                           | Main search | 02. Not CVD;         |
| Hawkes<br>2009    | for myocardial infarction patients ('ProActive Heart'); Study protocol. Secondary prevention program for myocardial infarction patients    | 10.1186/1471-2261-9-16    | Main search | 05.<br>Intervention; |
| Hawkes<br>2013    | Predictors of physical and mental health-related quality of life outcomes among myocardial infarction patients                             | 10.1186/1471-2261-13-69   | Main search | 05.<br>Intervention; |
| Hawthorne<br>2008 | Perceived social isolation in a community sample: its prevalence and correlates with aspects of peoples' lives                             | 10.1007/s00127-007-0279-8 | Main search | 02. Not CVD;         |

|               |                                                                                                                                                                              |                                    |             |                 |
|---------------|------------------------------------------------------------------------------------------------------------------------------------------------------------------------------|------------------------------------|-------------|-----------------|
| Haynes 2019   | Community-based participatory action research on rheumatic heart disease in an Australian Aboriginal homeland: Evaluation of the 'On track watch' project                    | 10.1016/j.evalprogplan.2019.02.010 | Main search | 03. Not SH;     |
| Heinrich 2013 | Myocardial infarction in singapore: Ethnic variation in evidence-based therapy and its association with socioeconomic status, social network size and perceived stress level | 10.1016/j.hlc.2013.04.119          | Main search | 01. Not AUS/NZ; |
| Hepburn 2019  | Early decision-making in acute pulmonary embolism: a retrospective clinical audit                                                                                            | 10.1111/imj.14042                  | Main search | 03. Not SH;     |
| Hodge 2013    | Social connectedness and predictors of successful ageing                                                                                                                     | 10.1016/j.maturitas.2013.05.002    | Main search | 02. Not CVD;    |



|                     |                                                                                                                      |                           |             |                                         |
|---------------------|----------------------------------------------------------------------------------------------------------------------|---------------------------|-------------|-----------------------------------------|
| Howe<br>2012        | 'You needed to rehab ... families as well': family members' own goals for aphasia rehabilitation                     |                           | Main search | 02. Not CVD;                            |
| Hsu-                |                                                                                                                      |                           |             |                                         |
| Hage<br>2001        | A qualitative investigation into the use of health services among Melbourne Chinese                                  |                           | Main search | 02. Not CVD;                            |
| Hua<br>2017         | Validation and recalibration of the Framingham cardiovascular disease risk models in an Australian Indigenous cohort | 10.1177/2047487317722913  | Main search | 03. Not SH;<br><br>04. CVD &<br><br>SH  |
| Huffm<br>an<br>2010 | Cardiovascular Health in Indigenous Communities: Successful Programs                                                 | 10.1016/j.hlc.2010.02.013 | Main search | mentioned<br><br>but no<br><br>outcome; |

|            |                                                                                                                                         |                              |             |                                      |
|------------|-----------------------------------------------------------------------------------------------------------------------------------------|------------------------------|-------------|--------------------------------------|
|            |                                                                                                                                         |                              |             | 04. CVD &                            |
| Hutchinson | Relationship between health-related quality of life, comorbidities and acute health care utilisation, in adults with chronic conditions | 10.1186/s12955-015-0260-2    | Main search | SH mentioned but no outcome;         |
| Hyun       | Gender inequalities in cardiovascular risk factor assessment and management in primary healthcare                                       | 10.1136/heartjnl-2016-310216 | Main search | 03. Not SH;                          |
| Ingles     | Sudden cardiac death in the young: a clinical genetic approach                                                                          |                              | Main search | 03. Not SH;                          |
| Ingles     | Medication non-compliance in patients with hypertrophic cardiomyopathy                                                                  | 10.1177/1474515114521363     | Main search | 07. Outcome not hospital utilisation |

|                       |                                                                                                                                                  |                                       |             |                                       |
|-----------------------|--------------------------------------------------------------------------------------------------------------------------------------------------|---------------------------------------|-------------|---------------------------------------|
| Iyngka<br>ran<br>2016 | Self Managing Heart Failure in Remote Australia - Translating<br>Concepts into Clinical Practice                                                 | 10.2174/1573403x1266<br>6160703183001 | Main search | 06.Review;                            |
|                       |                                                                                                                                                  |                                       |             | 04. CVD &                             |
| Jackso<br>n 2017      | Psychosocial Screening and Assessment Practice within Cardiac<br>Rehabilitation: A Survey of Cardiac Rehabilitation Coordinators<br>in Australia | 10.1016/j.hlc.2016.04.0<br>18         | Main search | SH<br>mentioned<br>but no<br>outcome; |
|                       |                                                                                                                                                  |                                       |             | 04. CVD &                             |
| Jacobs<br>2011        | Does being elderly and living alone impact on outcomes<br>following participation in a cardiac rehabilitation program?                           | 10.1016/j.hlc.2011.05.6<br>06         | Main search | SH<br>mentioned<br>but no<br>outcome; |

|                    |                                                                                                                          |                               |             |                              |
|--------------------|--------------------------------------------------------------------------------------------------------------------------|-------------------------------|-------------|------------------------------|
| Jeacocke<br>2002   | Adopting guideline review criteria as part of a regional project to improve heart failure management in general practice | 10.1108/14664100210427615     | Main search | 03. Not SH;                  |
| Jeon<br>2010       | Achieving a balanced life in the face of chronic illness                                                                 |                               | Main search | 02. Not CVD;                 |
| Jeremy<br>2010     | Improving Cardiovascular Care for Indigenous Populations                                                                 | 10.1016/j.hlc.2010.02.015     | Main search | 06.Review;                   |
| Kahl<br>2016       | Quality of life in adults with congenital heart disease: What matters?                                                   | 10.21037/jtd.2016.10.66       | Main search | 03. Not SH;                  |
| Karageorge<br>2020 | Previous experience and walking capacity predict community outings after stroke: An observational study                  | 10.1080/09593985.2018.1484829 | Main search | 04. CVD &<br>SH<br>mentioned |

but no  
outcome;

|                      |                                                                                                                                                                   |                                      |             |                      |
|----------------------|-------------------------------------------------------------------------------------------------------------------------------------------------------------------|--------------------------------------|-------------|----------------------|
| Karata<br>Åÿ<br>2017 | Perceived social support and psychosocial adjustment in<br>patients with coronary heart disease                                                                   | 10.1111/ijn.12558                    | Main search | 01. Not<br>AUS/NZ;   |
| Kendal<br>l 2007     | Recovery following stroke: The role of self-management<br>education                                                                                               | 10.1016/j.socscimed.2<br>006.09.012  | Main search | 05.<br>Intervention; |
| Keneal<br>y 2012     | A 'whole of system' approach to compare options for CVD<br>interventions in Counties Manukau                                                                      | 10.1111/j.1753-<br>6405.2011.00812.x | Main search | 03. Not SH;          |
| Kerr<br>2019         | A unified national cardiovascular disease (CVD) risk generator is required to address<br>equity in the management of CVD risk in clinical practice in New Zealand |                                      | Main search | 03. Not SH;          |
| Killey<br>2014       | Paths to work after stroke in Australia                                                                                                                           | 10.1017/BrImp.2014.1<br>8            | Main search | 03. Not SH;          |

|        |                                                                                      |                              |             |             |
|--------|--------------------------------------------------------------------------------------|------------------------------|-------------|-------------|
|        |                                                                                      |                              |             | 04. CVD &   |
| Kiropo | Increased psychosocial stress in Greek-born immigrants                               |                              |             | SH          |
| ulos   | compared to Anglo-Australians with coronary heart disease: the                       | 10.1016/j.hlc.2012.07.018    | Main search | mentioned   |
| 2012   | healthy heart, healthy mind study                                                    |                              |             | but no      |
|        |                                                                                      |                              |             | outcome;    |
| Knight | Developing a synthetic national population to investigate the                        |                              |             |             |
| 2017   | impact of different cardiovascular disease risk management                           | 10.1371/journal.pone.0173170 | Main search | 03. Not SH; |
|        | strategies: A derivation and validation study                                        |                              |             |             |
|        |                                                                                      |                              |             | 04. CVD &   |
| Kowal  | Enduring dilemmas of Indigenous health. "You're always hearing about the stats ...   |                              |             | SH          |
| 2010   | death happens so often": new perspectives on barriers to Aboriginal participation in |                              | Main search | mentioned   |
|        | cardiac rehabilitation. Comment                                                      |                              |             | but no      |
|        |                                                                                      |                              |             | outcome;    |

04. CVD &

SH

mentioned

but no

outcome;

Kritha

rides

2010

Overview and Determinants of Cardiovascular Disease in  
Indigenous Populations

10.1016/j.hlc.2010.02.0

17

Main search

Lanyo

n 2018

Exploring participant perspectives of community aphasia group  
participation: from "I know where I belong now" to "Some  
people didn't really fit in"

10.1080/02687038.201

7.1396574

Main search

02. Not CVD;

Lauck

ner

2016

Peer support for people with chronic conditions in rural areas: a scoping review

Main search

02. Not CVD;

Laude

r 2006

Social capital, age and religiosity in people who are lonely

Main search

02. Not CVD;

|                      |                                                                                                                                                                                 |                                       |             |                      |
|----------------------|---------------------------------------------------------------------------------------------------------------------------------------------------------------------------------|---------------------------------------|-------------|----------------------|
| Laude<br>r 2006      | A comparison of health behaviours in lonely and non-lonely<br>populations                                                                                                       | 10.1080/135485005002<br>66607         | Main search | 02. Not CVD;         |
| Lawre<br>nce<br>2017 | Yoga for stroke rehabilitation                                                                                                                                                  | 10.1002/14651858.CD<br>011483.pub2    | Main search | 05.<br>Intervention; |
| Leigh<br>2004        | The clinical support systems program                                                                                                                                            |                                       | Main search | 02. Not CVD;         |
| Leung<br>2010        | Geographic issues in cardiac rehabilitation utilization: A<br>narrative review                                                                                                  | 10.1016/j.healthplace.<br>2010.08.004 | Main search | 01. Not<br>AUS/NZ;   |
| Li 2016              | Impact of socioeconomic and risk factors on cardiovascular<br>disease and type II diabetes in Australia: comparison of results<br>from longitudinal and cross-sectional designs | 10.1136/bmjopen-<br>2015-010215       | Main search | 03. Not SH;          |



|             |                                                                                                                                                               |                              |             |                                       |
|-------------|---------------------------------------------------------------------------------------------------------------------------------------------------------------|------------------------------|-------------|---------------------------------------|
| Lieberman   | LIEBERMAN , LANI, B.A., MARTA MEANA, Ph.D.,<br>and DONNA STEWART, M.D., F.R.C.P.(C)                                                                           |                              | References  | 01. Not<br>AUS/NZ;                    |
|             |                                                                                                                                                               |                              |             | 04. CVD &                             |
| Liu<br>2016 | Risk factors for obstructive sleep apnea are prevalent in people<br>with psychosis and correlate with impaired social functioning<br>and poor physical health | 10.3389/fpsyt.2016.00<br>139 | Main search | SH<br>mentioned<br>but no<br>outcome; |
|             |                                                                                                                                                               |                              |             | 04. CVD &                             |
|             |                                                                                                                                                               |                              |             | SH                                    |
| Lo<br>2012  | Pediatric stroke outcome measure predicts cognitive and functional deficits after<br>childhood ischemic stroke                                                |                              | Main search | mentioned<br>but no<br>outcome;       |

|                     |                                                                                                                                                                             |                                |             |                                       |
|---------------------|-----------------------------------------------------------------------------------------------------------------------------------------------------------------------------|--------------------------------|-------------|---------------------------------------|
| Lobste<br>in 2004   | Obesity in children and young people: A crisis in public health                                                                                                             |                                | Main search | 02. Not CVD;                          |
|                     |                                                                                                                                                                             |                                |             | 04. CVD &                             |
| Longm<br>an<br>2012 | Frequent hospital admission of older people with chronic<br>disease: A cross-sectional survey with telephone follow-up and<br>data linkage                                  | 10.1186/1472-6963-12-<br>373   | Main search | SH<br>mentioned<br>but no<br>outcome; |
| Lord<br>2008        | How feasible is the attainment of community ambulation after<br>stroke? A pilot randomized controlled trial to evaluate<br>community-based physiotherapy in subacute stroke | 10.1177/026921550708<br>1922   | Main search | 05.<br>Intervention;                  |
| Lovell<br>2010      | Telehealth technologies for managing chronic disease -<br>Experiences from Australia and the UK                                                                             | 10.1109/IEMBS.2010.5<br>626312 | Main search | 03. Not SH;                           |

|                  |                                                                                                                                             |                                |             |                                                    |
|------------------|---------------------------------------------------------------------------------------------------------------------------------------------|--------------------------------|-------------|----------------------------------------------------|
| Lynch<br>2016    | Education-only versus a multifaceted intervention for improving assessment of rehabilitation needs after stroke; a cluster randomised trial | 10.1186/s13012-016-0487-2      | Main search | 03. Not SH;                                        |
| Lynch<br>2018    | Activity monitors for increasing physical activity in adult stroke survivors                                                                | 10.1002/14651858.CD012543.pub2 | Main search | 05.<br>Intervention;                               |
| Macniven<br>2012 | Barriers and enablers to physical activity among older Australians who think they are insufficiently active                                 | 10.1016/j.jsams.2012.11.110    | Main search | 02. Not CVD;                                       |
| Madse<br>n 2013  | 'This is a forever project': supporting lifestyle changes in a regional Queensland community-based cardiac rehabilitation program           | 10.1071/PY11137                | Main search | 04. CVD &<br>SH<br>mentioned<br>but no<br>outcome; |

|                      |                                                                                                                                                                   |                                   |             |                      |
|----------------------|-------------------------------------------------------------------------------------------------------------------------------------------------------------------|-----------------------------------|-------------|----------------------|
| Maiora<br>na<br>2015 | Reducing inequities in aboriginal Australian heart health<br>through culturally specific cardiac rehabilitation                                                   | 10.1177/204748731558<br>6733      | Main search | 03. Not SH;          |
| Manez<br>e 2018      | Negotiating health and chronic illness in Filipino-Australians: a<br>qualitative study with implications for health promotion                                     | 10.1080/13557858.201<br>7.1294656 | Main search | 02. Not CVD;         |
| Marm<br>ot 2000      | Social determinants of health: From observation to policy                                                                                                         |                                   | Main search | 02. Not CVD;         |
| Marsd<br>en<br>2010  | A multidisciplinary group programme in rural settings for<br>community-dwelling chronic stroke survivors and their carers: a<br>pilot randomized controlled trial | 10.1177/026921550934<br>4268      | Main search | 05.<br>Intervention; |
| Martin<br>2012       |                                                                                                                                                                   |                                   | References  | 01. Not<br>AUS/NZ;   |

|       |                                                                  |                        |             |             |
|-------|------------------------------------------------------------------|------------------------|-------------|-------------|
| McBri |                                                                  |                        | Author      |             |
| de    | McBride SA Aboriginal Cardiovascular Health Profile 2016         |                        | contact     | 03. Not SH; |
| 2016  |                                                                  |                        |             |             |
| McClu | Compliance with Australian stroke guideline recommendations      | 10.1186/s12913-015-    |             |             |
| skey  | for outdoor mobility and transport training by post-inpatient    | 0952-7                 | Main search | 03. Not SH; |
| 2015  | rehabilitation services: An observational cohort study           |                        |             |             |
| McKen |                                                                  |                        |             |             |
| na    | Comparison of time use, role participation and life satisfaction | 10.1111/j.1440-        | Main search | 03. Not SH; |
| 2009  | of older people after stroke with a sample without stroke        | 1630.2007.00728.x      |             |             |
| McLac |                                                                  |                        |             |             |
| hlan  | Equity of access to CVD risk management using electronic         | 10.1016/j.ejcnurse.201 | Main search | 03. Not SH; |
| 2010  | clinical decision support in the coronary care unit              | 0.01.007               |             |             |

McLau

ghlin Travelling sales: An occupational hazard?

Main search 02. Not CVD;

2000

Meyer Differentiating between trust and dependence of patients with 10.1080/13698575.201

2013 coronary heart disease: furthering the sociology of trust 3.776017

Main search 03. Not SH;

Milliga

n 1997

Health-related behaviours and psycho-social characteristics of 18 year-old Australians

Main search 02. Not CVD;

04. CVD &

SH

Mitche

ll 1992

A cross-cultural assessment of perceived health problems in the elderly

Main search mentioned

but no

outcome;

|               |                                                                                                                                                                           |                    |             |                                      |
|---------------|---------------------------------------------------------------------------------------------------------------------------------------------------------------------------|--------------------|-------------|--------------------------------------|
| Mitchell 2014 | The healthy neighbourhood audit instrument: Understanding the environmental and socio-cultural conditions to support healthy, happy and resilient residential communities |                    | Main search | 02. Not CVD;                         |
| Moorley 2015  | Life after stroke: Releasing the cultural hostage                                                                                                                         | 10.1111/ijbs.12584 | Main search | 01. Not AUS/NZ;                      |
| Morris 1991   | The relationship between the perception of social support and post-stroke depression in hospitalized patients                                                             |                    | Main search | 07. Outcome not hospital utilisation |
| Murphy (2008) |                                                                                                                                                                           |                    | References  | 07. Outcome not hospital utilisation |

|         |                                                                                                                                                         |                           |             |                                            |
|---------|---------------------------------------------------------------------------------------------------------------------------------------------------------|---------------------------|-------------|--------------------------------------------|
| Murphy  | Are poor health behaviours in anxious and depressed cardiac patients explained by sociodemographic factors?                                             | 10.1177/2047487312449593  | Main search | 07. Outcome<br>not hospital<br>utilisation |
| Murphy  | Red flags for persistent or worsening anxiety and depression after an acute cardiac event: a 6-month longitudinal study in regional and rural Australia | 10.1177/2047487313493058  | Main search | 07. Outcome<br>not hospital<br>utilisation |
| Myburgh | Coping and Cardiac Troponin T – A Risk for Hypertension and Sub-Clinical ECG Left Ventricular Hypertrophy: The SABPA Study                              | 10.1016/j.hlc.2018.05.101 | Main search | 02. Not CVD;                               |
| Nelson  | Developing cardiovascular risk prediction models for Australia                                                                                          | 10.5694/mja2.50010        | Main search | 03. Not SH;                                |
| O'Mara  | The spirit of the tent embassy: 40 years on indigenous self-determination is essential to health and wellbeing                                          | 10.5694/mja12.10829       | Main search | 02. Not CVD;                               |



|                 |                                                                                                                                                                                                                                                                                      |                               |             |                      |
|-----------------|--------------------------------------------------------------------------------------------------------------------------------------------------------------------------------------------------------------------------------------------------------------------------------------|-------------------------------|-------------|----------------------|
| Paisley<br>2008 | Dietary change: What are the responses and roles of significant others?<br><br>Understanding the impact of a multifaceted quality improvement intervention to improve cardiovascular disease risk management in Australian primary health care: The TORPEDO study process evaluation | 10.1016/j.jneb.2007.04.374    | Main search | 02. Not CVD;         |
| Patel<br>2014   | A multifaceted quality improvement intervention for CVD risk management in Australian primary healthcare: a protocol for a process evaluation                                                                                                                                        | 10.1016/j.gheart.2014.03.2002 | Main search | 05.<br>Intervention; |
| Patel<br>2014   | Impact of sustained use of a multifaceted computerized quality improvement intervention for cardiovascular disease management in Australian primary health care                                                                                                                      | 10.1186/s13012-014-0187-8     | Main search | 05.<br>Intervention; |
| Patel<br>2017   |                                                                                                                                                                                                                                                                                      | 10.1161/JAHA.117.007093       | Main search | 05.<br>Intervention; |

|                       |                                                                                                                                                                                                                         |                                                     |             |                                            |
|-----------------------|-------------------------------------------------------------------------------------------------------------------------------------------------------------------------------------------------------------------------|-----------------------------------------------------|-------------|--------------------------------------------|
|                       | What drives adoption of a computerised, multifaceted quality improvement intervention for cardiovascular disease management in primary healthcare settings? A mixed methods analysis using normalisation process theory | 10.1186/s13012-018-0830-x                           | Main search | 03. Not SH;                                |
| Patel<br>2018         |                                                                                                                                                                                                                         |                                                     |             |                                            |
| Patters<br>on<br>2009 | Long-term stroke survivorsâ€™ needs and perceptions of an exercise maintenance model of care                                                                                                                            | 10.12968/ijtr.2009.16.12.45422                      | Main search | 07. Outcome<br>not hospital<br>utilisation |
| Patters<br>on<br>2010 | Stroke maintenance exercise group: Pilot study on daily functioning in long-term stroke survivors                                                                                                                       | 10.1071/PY09055<br>10.1046/j.1365-2648.2000.01517.x | Main search | 05.<br>Intervention;                       |
| Paul<br>2005          |                                                                                                                                                                                                                         |                                                     | References  | 03. Not SH;                                |

|                |                                                                                                                                                                   |                                     |             |                   |
|----------------|-------------------------------------------------------------------------------------------------------------------------------------------------------------------|-------------------------------------|-------------|-------------------|
| Peiris<br>2009 | An electronic clinical decision support tool to assist primary care providers in cardiovascular disease risk management: development and mixed methods evaluation |                                     | Main search | 03. Not SH;       |
|                | Effect of a multi-faceted quality improvement intervention to                                                                                                     |                                     |             |                   |
| Peiris<br>2014 | improve cardiovascular disease risk identification and management in australian primary health care: The torpedo cluster-randomised trial                         | 10.1016/j.gheart.2014.03.1317       | Main search | 05. Intervention; |
|                | Effect of a computer-guided, quality improvement program for                                                                                                      |                                     |             |                   |
| Peiris<br>2015 | cardiovascular disease risk management in primary health care: The treatment of cardiovascular risk using electronic decision support cluster-randomized trial    | 10.1161/CIRCOUTCO<br>MES.114.001235 | Main search | 05. Intervention; |
| Penn<br>2017   | Intercultural aphasia: new models of understanding for Indigenous populations                                                                                     | 10.1080/02687038.2016.1213788       | Main search | 02. Not CVD;      |

|                  |                                                                                                                                                                   |                                     |             |                                                |
|------------------|-------------------------------------------------------------------------------------------------------------------------------------------------------------------|-------------------------------------|-------------|------------------------------------------------|
|                  |                                                                                                                                                                   |                                     |             | 04. CVD &<br>SH                                |
| Petrie<br>1996   | Role of patients' view of their illness in predicting return to work and functioning after myocardial infarction: longitudinal study                              |                                     | Main search | mentioned<br><br>but no<br><br>outcome;        |
| Pettma<br>n 2008 | Self-management for obesity and cardio-metabolic fitness:<br>Description and evaluation of the lifestyle modification program<br>of a randomised controlled trial | 10.1186/1479-5868-5-<br>53          | Main search | 05.<br><br>Intervention;                       |
| Pier<br>2008     | Identifying the health and mental health information needs of people with coronary heart disease, with and without depression                                     |                                     | Main search | 07. Outcome<br><br>not hospital<br>utilisation |
| Pit<br>2010      | Health problems and retirement due to ill-health among<br>Australian retirees aged 45-64 years                                                                    | 10.1016/j.healthpol.20<br>09.09.003 | Main search | 02. Not CVD;                                   |

|                   |                                                                                                                                                 |                                     |             |                                                    |
|-------------------|-------------------------------------------------------------------------------------------------------------------------------------------------|-------------------------------------|-------------|----------------------------------------------------|
| Pitama<br>2011    | A Kaupapa Maori approach to a community cohort study of heart disease in New Zealand                                                            | 10.1111/j.1753-6405.2011.00702.x    | Main search | 03. Not SH;                                        |
| Provan<br>ce 2019 | Assessing Patient Preferences for Shared Decision-Making in Peripheral Artery Disease: Insights from the PORTRAIT Registry                      | 10.1161/CIRCOUTCO<br>MES.119.005730 | Main search | 01. Not<br>AUS/NZ;                                 |
| Quigley<br>y 2019 | Are we there yet? Exploring the journey to quality stroke care for Aboriginal and Torres Strait Islander peoples in rural and remote Queensland | 10.22605/RRH4850                    | Main search | 04. CVD &<br>SH<br>mentioned<br>but no<br>outcome; |
| Quirk<br>2018     | Predictors of Physical Activity Among Rural Adults Following Cardiac Rehabilitation                                                             | 10.1037/rep0000232                  | Main search | 07. Outcome<br>not hospital<br>utilisation         |

|                     |                                                                                                                                                                                        |                                 |             |                                         |
|---------------------|----------------------------------------------------------------------------------------------------------------------------------------------------------------------------------------|---------------------------------|-------------|-----------------------------------------|
| Raban<br>al 2018    | Performance of a Framingham cardiovascular risk model among<br>Indians and Europeans in New Zealand and the role of body<br>mass index and social deprivation                          | 10.1136/openhrt-<br>2018-000821 | Main search | 03. Not SH;                             |
| Ramsa<br>my<br>2017 | A retrospective audit of post discharge outcome for patients<br>supported by 'acute coronary syndrome support network' to<br>remote communities in the northern territory of australia | 10.1016/j.hlc.2017.06.6<br>64   | Main search | 03. Not SH;<br><br>04. CVD &<br><br>SH  |
| Ranta<br>2013       | TIA management in rural and provincial New Zealand                                                                                                                                     | 10.1111/ijvs.12141              | Main search | mentioned<br><br>but no<br><br>outcome; |
| Ray<br>2001         | Self-reported heart health behaviour patterns in a rural context                                                                                                                       |                                 | Main search | 02. Not CVD;                            |

04. CVD &

SH

mentioned

but no

outcome;

Reilly  
2008 Identifying psychosocial mediators of health amongst  
indigenous Australians for the Heart Health Project

10.1080/135578508019  
03046

Main search

Riddel  
1 2012 Cluster randomized controlled trial of a peer support program  
for people with diabetes: Study protocol for the Australasian  
peers for progress study

10.1186/1471-2458-12-  
843

Main search

02. Not CVD;

Riddel  
1 2016 Cardiovascular risk outcome and program evaluation of a  
cluster randomised controlled trial of a community-based, lay  
peer led program for people with diabetes

10.1186/s12889-016-  
3538-3

Main search

02. Not CVD;

Robins

on

1999

References

01. Not

AUS/NZ;

Rosber Embedding an enriched environment in an acute stroke unit

gen increases activity in people with stroke: a controlled before-after

2017 pilot study

10.1177/026921551770

5181

Main search

05.

Intervention;

Rosber

gen

2019

The impact of environmental enrichment in an acute stroke unit

on how and when patients undertake activities

10.1177/026921551882

0087

Main search

05.

Intervention;

Rosen

gren

2004

References

03. Not SH;



|        |                                                                |                       |             |              |
|--------|----------------------------------------------------------------|-----------------------|-------------|--------------|
| Roslan |                                                                |                       | References  | 01. Not      |
| d 2010 |                                                                |                       |             | AUS/NZ;      |
| Ryan   | A cross-sectional study of work-related and lifestyle factors  | 10.1080/21679169.201  |             |              |
| 2017   | associated with the health of Australian long distance commute | 7.1381324             | Main search | 02. Not CVD; |
|        | and residential miners                                         |                       |             |              |
|        |                                                                |                       |             | 04. CVD &    |
|        |                                                                |                       |             | SH           |
| Sahle  | Association of Psychosocial Factors With Risk of Chronic       | 10.1016/j.amepre.2019 |             |              |
| 2020   | Diseases: A Nationwide Longitudinal Study                      | .09.007               | Main search | mentioned    |
|        |                                                                |                       |             | but no       |
|        |                                                                |                       |             | outcome;     |
| Sapup  |                                                                |                       |             | 07. Outcome  |
| po     | The unmet needs of young stroke survivors                      | 10.1177/174749301877  |             |              |
| 2018   |                                                                | 8666                  | Main search | not hospital |
|        |                                                                |                       |             | utilisation  |

|                 |                                                                                                                                     |                                    |             |                                               |
|-----------------|-------------------------------------------------------------------------------------------------------------------------------------|------------------------------------|-------------|-----------------------------------------------|
| Scott<br>2004   | Achieving better in-hospital and after-hospital care of patients with acute cardiac disease                                         |                                    | Main search | 05.<br>Intervention;                          |
| Scott<br>2015   | Body mass, cardiovascular risk and metabolic characteristics of young persons presenting for mental healthcare in Sydney, Australia | 10.1136/bmjopen-2014-007066        | Main search | 02. Not CVD;                                  |
| Shanks<br>2007  | Author confirms                                                                                                                     |                                    | References  | 01. Not<br>AUS/NZ;<br><br>04. CVD &<br><br>SH |
| Simon<br>s 1991 | DUBBO STUDY OF THE ELDERLY - SOCIOLOGICAL AND CARDIOVASCULAR RISK-FACTORS AT ENTRY                                                  | 10.1111/j.1445-5994.1991.tb01373.x | Main search | mentioned<br><br>but no<br><br>outcome;       |

04. CVD &

SH

Simon

Impact of loneliness and living alone

s 2013

Main search

mentioned

but no

outcome;

Sinnott

Lifestyle, health and disease: a comparison between Papua New Guinea and Australia

1978

Main search

02. Not CVD;

Ski

Stroke: the increasing complexity of carer needs

2007

Main search

02. Not CVD

07. Outcome

Son

Biopsychosocial predictors of coping strategies of patients

2016

postmyocardial infarction

10.1111/ijn.12465

Main search

not hospital

utilisation

|         |                                                                    |                        |             |              |
|---------|--------------------------------------------------------------------|------------------------|-------------|--------------|
| Son     | How do patients develop self-care behaviors to live well with      | 10.1016/j.colegn.2018. | Main search | 01. Not      |
| 2019    | heart failure?: A focus group interview study                      | 12.004                 |             | AUS/NZ;      |
| Spader  | Role of Depression and Social Isolation at Time of Waitlisting for | 10.1161/JAHA.117.00    | Main search | 02. Not CVD  |
| na      | Survival 8 Years After Heart Transplantation                       | 7016                   |             |              |
| 2017    |                                                                    |                        |             |              |
| Spaeth  | Economic evaluation of point-of-care testing in the remote         | 10.2147/CEOR.S16029    | Main search | 03. Not SH;  |
| 2018    | primary health care setting of Australia's Northern Territory      | 1                      |             |              |
|         | Patient and general practitioner attitudes to healthy lifestyle    |                        |             | 07. Outcome  |
| Speech  | behaviours and medication following coronary heart disease: An     | 10.1071/PY09011        | Main search | not hospital |
| ly 2010 | exploratory study                                                  |                        |             | utilisation  |
| Stapel  | A topographical map of the causal network of mechanisms            | 10.3109/00048674.201   | Main search | 04. CVD &    |
| berg    | underlying the relationship between major depressive disorder      | 1.570427               |             | SH           |
| 2011    | and coronary heart disease                                         |                        |             | mentioned    |

|                |                                                                                                                                                                                     |                           |             |                                                    |
|----------------|-------------------------------------------------------------------------------------------------------------------------------------------------------------------------------------|---------------------------|-------------|----------------------------------------------------|
|                |                                                                                                                                                                                     |                           |             | but no                                             |
|                |                                                                                                                                                                                     |                           |             | outcome;                                           |
|                |                                                                                                                                                                                     |                           |             | 04. CVD &                                          |
|                |                                                                                                                                                                                     |                           |             | SH                                                 |
| Strodl<br>2008 | The 5-item mental health index predicts the initial diagnosis of nonfatal stroke in older women                                                                                     | 10.1089/jwh.2007.0516     | Main search | mentioned<br><br>but no<br><br>outcome;            |
| Strodl<br>2013 | A history of heart interventions moderates the relationship between psychological variables and the presence of chest pain in older women with self-reported coronary heart disease | 10.1111/bjhp.12011        | Main search | 07. Outcome<br><br>not hospital<br><br>utilisation |
| Stuart<br>2014 | A telephone-supported cardiovascular lifestyle programme (CLIP) for lipid reduction and weight loss in general practice patients: a randomised controlled pilot trial               | 10.1017/S1368980013000220 | Main search | 05.<br><br>Intervention;                           |

|               |                                                                                                                                              |                               |             |                                                |
|---------------|----------------------------------------------------------------------------------------------------------------------------------------------|-------------------------------|-------------|------------------------------------------------|
|               |                                                                                                                                              |                               |             | 04. CVD &<br>SH                                |
| Sturm<br>2004 |                                                                                                                                              |                               | References  | mentioned<br><br>but no<br><br>outcome;        |
| Tamplin 2013  | 'Stroke a chord': The effect of singing in a community choir on mood and social engagement for people living with aphasia following a stroke | 10.3233/NRE-130916            | Main search | 02. Not CVD;                                   |
| Tavener 2015  | Acknowledging How Older Australian Women Experience Life After Stroke: How Does the WHO 18-Item Brief ICF Core Set for Stroke Compare?       | 10.1080/07399332.2015.1055747 | Main search | 07. Outcome<br><br>not hospital<br>utilisation |
| Taylor 2014   | Implementing the evidence: From presumption to training                                                                                      | 10.1111/ijbs.12334            | Main search | 04. CVD &<br>SH                                |

mentioned

but no

outcome;

Thom

pson

Gender disparities in cardiovascular disease prevention

10.1136/heartjnl-2016-  
310788

Main search

03. Not SH;

2017

Thurst

on

What Happens Next? The Role of Cardiac Rehabilitation in Total  
Patient Care

10.1016/j.hlc.2008.09.0  
05

Main search

05.

Intervention;

2008

Tibby

Establishment of an Innovative Specialist Cardiac Indigenous  
Outreach Service in Rural and Remote Queensland

10.1016/j.hlc.2010.02.0  
23

Main search

03. Not SH;

2010

|                         |                                                                                                                                               |                               |             |                                            |
|-------------------------|-----------------------------------------------------------------------------------------------------------------------------------------------|-------------------------------|-------------|--------------------------------------------|
| Tidem<br>an<br>2014     | Impact of a regionalised clinical cardiac support network on mortality among rural patients with myocardial infarction                        |                               | Main search | 03. Not SH;                                |
| Tse<br>2017             | Reduction in retained activity participation is associated with depressive symptoms 3 months after mild stroke: An observational cohort study | 10.2340/16501977-2184         | Main search | 07. Outcome<br>not hospital<br>utilisation |
| Tse<br>2018             | Longitudinal changes in activity participation in the first year post-stroke and association with depressive symptoms                         | 10.1080/09638288.2018.1471742 | Main search | 07. Outcome<br>not hospital<br>utilisation |
| Tsuchihashi-Makaya 2009 |                                                                                                                                               |                               | References  | 01. Not<br>AUS/NZ;                         |
| Tully<br>2014           | Routine depression screening after cardiac surgery simply misses those that need it most: Impact of missed cases on                           | 10.1177/1474515114521363      | Main search | 04. CVD &<br>SH                            |



hospital resource utilization, cardiac outcomes, depression and  
quality of life

mentioned  
  
but no  
  
outcome;

Unsw

rth      Agreement Between Occupational Therapists and Clients with Stroke on Three  
1997a

Author  
  
contact

03. Not SH;  
  
  
04. CVD &

Unsw

rth      Decision polarization  
1997b

Author  
  
contact

SH  
  
mentioned  
  
but no  
  
outcome;

|                       |                                                                                                                                                                                   |                                            |                   |                                            |
|-----------------------|-----------------------------------------------------------------------------------------------------------------------------------------------------------------------------------|--------------------------------------------|-------------------|--------------------------------------------|
| Unswor<br>rth<br>2002 | Examining the Evidence Base for Occupational Therapy with Clients following Stroke                                                                                                |                                            | Author<br>contact | 03. Not SH;                                |
| Unswor<br>rth<br>2005 | A Comparison of Client Outcomes from Two Acute Care Neurological Services using Self-care Data from the Australian Therapy Outcome Measures for Occupational Therapy (AusTOMs-OT) |                                            | Author<br>contact | 03. Not SH;                                |
| Unswor<br>rth<br>2019 | Preliminary Screening Recommendations for Patients at Risk of Depression and/or Anxiety more than 1 year Poststroke                                                               | 10.1016/j.jstrokecerebrovasdis.2019.03.014 | Main search       | 07. Outcome<br>not hospital<br>utilisation |
| Vallesi<br>2018       | "In Their Own Voice"-Incorporating Underlying Social Determinants into Aboriginal Health Promotion Programs                                                                       | 10.3390/ijerph15071514                     | Main search       | 02. Not CVD;                               |
| Vogt<br>1992          |                                                                                                                                                                                   |                                            | References        | 01. Not<br>AUS/NZ;                         |

|       |                                                            |                         |             |              |
|-------|------------------------------------------------------------|-------------------------|-------------|--------------|
| Volz  |                                                            |                         | References  | 01. Not      |
| 2011  |                                                            |                         |             | AUS/NZ;      |
|       |                                                            |                         |             | 04. CVD &    |
| VonDo |                                                            |                         |             | SH           |
| hren  | Taking therapeutic leisure and recreation seriously during | 10.1111/ij.s.12172      | Main search | mentioned    |
| 2013  | stroke recovery                                            |                         |             | but no       |
|       |                                                            |                         |             | outcome;     |
|       |                                                            |                         |             | 07. Outcome  |
| Wang  | The prevalence and predictors of anxiety and depression in | 10.1111/j.1445-         | Main search | not hospital |
| 2010  | adolescents with heart disease                             | 5994.2010.02186.x       |             | utilisation  |
|       |                                                            |                         |             | 07. Outcome  |
| Wang  | Psychosocial functioning in adolescents with heart disease | 10.1016/j.hlc.2011.05.5 | Main search | not hospital |
| 2011  |                                                            | 99                      |             | utilisation  |

|                       |                                                                                                                                         |                          |             |                    |
|-----------------------|-----------------------------------------------------------------------------------------------------------------------------------------|--------------------------|-------------|--------------------|
| Ward<br>2011          | With good intentions: complexity in unsolicited informal support for Aboriginal and Torres Strait Islander peoples. A qualitative study | 10.1186/1471-2458-11-686 | Main search | 02. Not CVD;       |
| Wells<br>2011         | The predictive power of family history of premature CVD in a large new zealand primary care cohort                                      | 10.1093/eurheartj/ehr323 | Main search | 03. Not SH;        |
| Wells<br>2017         | Cohort Profile: The PREDICT cardiovascular disease cohort in New Zealand primary care (PREDICT-CVD 19)                                  | 10.1093/ije/dyv312       | Main search | 03. Not SH;        |
| Westbr<br>ook<br>1993 | Attitudes towards disabilities in a multicultural society                                                                               |                          | Main search | 02. Not CVD        |
| Westla<br>ke<br>2002  |                                                                                                                                         |                          | References  | 01. Not<br>AUS/NZ; |

|       |                                                                                      |                   |             |           |
|-------|--------------------------------------------------------------------------------------|-------------------|-------------|-----------|
|       |                                                                                      |                   |             | 04. CVD & |
|       |                                                                                      |                   |             | SH        |
| White | Community-dwelling stroke survivors: function is not the whole story with quality of |                   | Main search | mentioned |
| 2007  | life                                                                                 |                   |             | but no    |
|       |                                                                                      |                   |             | outcome;  |
|       |                                                                                      |                   |             | 04. CVD & |
|       |                                                                                      |                   |             | SH        |
| White | The occupational experience of stroke survivors in a community                       | 10.3928/15394492- | Main search | mentioned |
| 2008  | setting                                                                              | 20080901-05       |             | but no    |
|       |                                                                                      |                   |             | outcome;  |
|       |                                                                                      |                   |             | 04. CVD & |
| White |                                                                                      |                   | References  | SH        |
| 2008  |                                                                                      |                   |             | mentioned |

but no  
outcome;

07. Outcome  
not hospital  
utilisation

07. Outcome  
not hospital  
utilisation

07. Outcome  
not hospital  
utilisation

White  
2009  
Exploring poststroke mood changes in community-dwelling  
stroke survivors: A prospective, longitudinal, mixed methods  
study

10.1111/j.1747-  
4949.2009.00306.x

Main search

White  
2010  
Exploring post-stroke mood changes in community-dwelling  
stroke survivors: A longitudinal cohort study

10.1111/j.1747-  
4949.2010.00458-3.x

Main search

White  
2016  
Predictors of health-related quality of life in community-  
dwelling stroke survivors: a cohort study

10.1093/fampra/cmw  
011

Main search

|                      |                                                                                                                                                       |                                    |             |                                 |
|----------------------|-------------------------------------------------------------------------------------------------------------------------------------------------------|------------------------------------|-------------|---------------------------------|
| Wilson<br>1993       | The Good Heart, Good Life survey: self-reported cardiovascular disease risk factors, health knowledge and attitudes among Greek Australians in Sydney | 10.1111/j.1753-6405.1993.tb00138.x | Main search | 02. Not CVD;                    |
| Worral               |                                                                                                                                                       |                                    |             | 04. CVD &<br>SH                 |
| l-<br>Carter<br>2005 | The experiences and adjustments of women following their first acute myocardial infarction                                                            |                                    | Main search | mentioned<br>but no<br>outcome; |
| Wu<br>2013           |                                                                                                                                                       |                                    | References  | 01. Not<br>AUS/NZ;              |
| Yarmo<br>-           | The heart of the matter: Health status of aged care clients receiving home- and community-based care                                                  | 10.4061/2010/275303                | Main search | 02. Not CVD;                    |

Robert

s 2010

Yusuf

2004

References 03. Not SH;

04. CVD &

SH

Zecchi Cardiac rehabilitation for patients with spontaneous coronary

10.1016/j.hlc.2016.06.7

n 2016 artery dissection

68

Main search mentioned

but no

outcome;

Zhang

Using the Think Aloud™ Technique to Explore Quality of Life

10.1016/j.hlc.2016.05.1

Issues During Standard Quality-of-Life Questionnaires in

2017

Patients With Atrial Fibrillation

21

Main search

05.

Intervention;
